1 **Dual control of MAPK activities by AP2C1 and MKP1 MAPK**  
2 **phosphatases regulates defence responses in Arabidopsis**

3

4 Zahra Ayatollahi<sup>1</sup>, Vaiva Kazanaviciute<sup>1,2</sup>, Volodymyr Shubchynskyy<sup>1</sup>, Kotryna  
5 Kvederaviciute<sup>3</sup>, Manfred Schwanninger<sup>4#</sup>, Wilfried Rozhon<sup>5</sup>, Michael  
6 Stumpe<sup>6</sup>, Felix Mauch<sup>6</sup>, Sebastian Bartels<sup>7</sup>, Roman Ulm<sup>8</sup>, Salma  
7 Balazadeh<sup>9,10,11</sup>, Bernd Mueller-Roeber<sup>9,10</sup>, Irute Meskiene<sup>1,12 ##</sup> and Alois  
8 Schweighofer<sup>1,12§</sup>

9

10 <sup>1</sup>Max Perutz Labs, University of Vienna, Vienna BioCenter, Dr. -Bohr-Gasse  
11 9, A-1030 Vienna, Austria

12 <sup>2</sup>Present address: UAB Nomads, Gelezinio Vilko 29A, LT-01112 Vilnius,  
13 Lithuania

14 <sup>3</sup>Institute of Biotechnology, Life Sciences Center, Vilnius University,  
15 Sauletekio al. 7, LT-10257 Vilnius, Lithuania

16 <sup>4</sup>Department of Chemistry, University of Natural Resources and Applied Life  
17 Sciences, Muthgasse 18, A-1190 Vienna, Austria

18 <sup>5</sup>Anhalt University of Applied Sciences, Department for Inorganic and Organic  
19 Chemistry, Strenzfelder Allee 28, D-06406 Bernburg, Germany

20 <sup>6</sup>Department of Biology, Chemin du Musée 10, CH-1700 Fribourg,  
21 Switzerland

22 <sup>7</sup>Faculty of Biology, Institute of Biology II, University of Freiburg,  
23 Schänzlestraße 1, D-79104 Freiburg, Germany

24 <sup>8</sup>Department of Botany and Plant Biology, Section of Biology, Faculty of  
25 Sciences, University of Geneva, 30 Quai E. Ansermet, CH-1211 Geneva,  
26 Switzerland

27 <sup>9</sup>Max-Planck-Institute of Molecular Plant Physiology (MPIMP), Am  
28 Mühlenberg 1, D-14476 Potsdam, Germany

29 <sup>10</sup>University of Potsdam, Karl-Liebknecht-Straße 24, D-14476 Potsdam,  
30 Germany

31 <sup>11</sup>Institute of Biology Leiden (IBL), University of Leiden, Sylviusweg 72, BE-  
32 2333 Leiden, The Netherlands

33 <sup>12</sup>Department of Functional and Evolutionary Ecology, University of Vienna,  
34 Althanstraße 14, A-1090 Vienna, Austria

35 # deceased December 2013, ## deceased July 2017

36 §Corresponding author: [alois.schweighofer@univie.ac.at](mailto:alois.schweighofer@univie.ac.at)

37

38 **Running title**

39 AP2C1 and MKP1 regulate defence responses

40

41 **Highlight**

42 Double MAPK phosphatase mutant plants *ap2c1 mkp1* exhibit constitutive,  
43 autoimmune-like stress responses, dependent on their substrate MAPK  
44 MPK6.

45

46 **ORCID IDs:**

47 Zahra Ayatollahi: 0000-0002-8022-1051

48 Vaiva Kazanaviciute: 0000-0002-0427-8718

49 Kotryna Kvederaviciute: 0000-0002-2091-6935

50 Manfred Schwanninger: 0000-0002-5822-9129

51 Wilfried Rozhon: 0000-0003-0659-0593

52 Michael Stumpe: 0000-0002-9443-9326

53 Felix Mauch: 0000-0001-5150-2711

54 Sebastian Bartels: 0000-0002-6831-7392

55 Roman Ulm: 0000-0001-8014-7392

56 Salma Balazadeh: 0000-0002-5789-4071

57 Bernd Mueller-Roeber: 0000-0002-1410-464X

58 Alois Schweighofer: 0000-0002-8466-0924

59

60

61 **Abstract**

62 Mitogen-activated protein kinase (MAPK) cascades transmit environmental  
63 signals and induce stress and defence responses in plants. These signalling  
64 cascades are negatively controlled by specific phosphatases of the type 2C  
65 Ser/Thr protein phosphatase (PP2C) and dual-specificity phosphatase (DSP)  
66 families that inactivate stress-induced MAPKs; however, the interplay  
67 between phosphatases of these different types has remained unknown. Our  
68 work reveals that different Arabidopsis MAPK phosphatases, the PP2C-type  
69 AP2C1 and the DSP-type MKP1, exhibit both specific and overlapping  
70 functions in plant stress responses. Each single mutant and *ap2c1 mkp1*  
71 double mutant displayed enhanced wound-induced activation of MAPKs  
72 MPK3, MPK4, and MPK6, as well as induction of a set of transcription factors.  
73 Moreover, *ap2c1 mkp1* double mutants show an autoimmune-like response,  
74 associated with elevated levels the stress hormones salicylic acid and  
75 ethylene, and of the phytoalexin camalexin. Interestingly, this phenotype is  
76 reduced in *ap2c1 mkp1 mpk6* triple mutants, suggesting that the autoimmune-  
77 like response is due to MPK6 misregulation. We conclude that the  
78 evolutionarily distant MAPK phosphatases AP2C1 and MKP1 contribute  
79 crucially to the tight control of MPK6 activity, ensuring appropriately balanced  
80 stress signalling and suppression of autoimmune-like responses during plant  
81 growth and development.

82

83 **Keywords**

84 ANAC, AP2C1, Arabidopsis, DSP, MAPK, MKP1, PP2C, WRKY.

85

86

87

## 88 **Introduction**

89 Reversible protein phosphorylation is one of the most commonly used  
90 mechanisms for the molecular transmission of stress signals and  
91 developmental cues. This mechanism is based on the opposing actions of  
92 protein kinases and protein phosphatases. Mitogen-activated protein kinases  
93 (MAPKs) are highly conserved major components of developmental and  
94 stress signalling cascades in eukaryotes. MAPKs are activated by upstream  
95 MAPK kinases via phosphorylation of Thr and Tyr within their activation loop.  
96 This activation eventually leads to the reprogramming of cellular activities,  
97 including the modulation of gene expression, to generate appropriate  
98 responses. The activation of MAPKs does not represent a simple on/off  
99 switch, as both the magnitude and duration of activation are crucial for  
100 determining the signalling outcome (Marshall, 1995). Prolonged or constant  
101 activation of a MAPK cascade can have detrimental effects as illustrated by  
102 the hypersensitive response (HR)-induced cell death in plants expressing a  
103 constitutively active MAPK kinase version (Liu *et al.*, 2007; Ren *et al.*, 2002).  
104 Thus, negative regulation and inactivation mechanisms are important for the  
105 correct cellular response. Specific protein phosphatases can dephosphorylate  
106 and thereby inactivate MAPKs. As dual phosphorylation of the Thr-X-Tyr motif  
107 in the activation loop is required for MAPK activation (Caunt and Keyse,  
108 2013), dephosphorylation of either phospho-amino acid residue inactivates  
109 the MAPK and inhibits downstream signalling. Interestingly, this inactivation  
110 can be accomplished by evolutionarily distant protein phosphatases, including  
111 PP2C-type MAPK phosphatases (Fuchs *et al.*, 2013; Schweighofer *et al.*,  
112 2004; Schweighofer *et al.*, 2007) and PTP-type dual specificity (Tyr and  
113 Ser/Thr) phosphatases (DSPs) (Bartels *et al.*, 2010; Jiang *et al.*, 2018).  
114 However, their interplay is presently unknown.

115 *Arabidopsis thaliana* DSP-type mitogen-activated protein kinase phosphatase  
116 1 (MKP1) interacts with the stress-responsive MAPKs MPK3, MPK4 and  
117 MPK6, and controls their activities (Anderson *et al.*, 2011; Bartels *et al.*, 2009;  
118 Ulm *et al.*, 2002). The *mkp1* knockout mutant is hypersensitive to genotoxic  
119 stress, including UV-B radiation (Gonzalez Besteiro *et al.*, 2011; Gonzalez  
120 Besteiro and Ulm, 2013; Ulm *et al.*, 2002; Ulm *et al.*, 2001), but is more

121 resistant than wild type (WT) to the virulent bacterial pathogen *Pseudomonas*  
122 *syringae* pv. *tomato* (*Pst*) (Anderson *et al.*, 2011; Anderson *et al.*, 2014;  
123 Bartels *et al.*, 2009). Specifically in the Arabidopsis Columbia accession,  
124 *mkp1* shows an autoimmune-like growth phenotype dependent on the disease  
125 resistance gene homologue *SUPPRESSOR OF npr1-1*, *CONSTITUTIVE 1*  
126 (*SNC1*) and is associated with enhanced MAPK activities (Bartels *et al.*,  
127 2009). The phospho-Tyr-specific PTP-type protein phosphatase PTP1 also  
128 interacts with MPK6 and MPK3 in transient assays. The lack of both MKP1  
129 and PTP1 in the *mkp1 ptp1* double mutant leads to upregulation of MPK6-  
130 dependent plant defence responses and a further enhanced autoimmune-like  
131 phenotype (Bartels *et al.*, 2009).

132 A group of PP2C-type phosphatases, including AP2C1, interacts with  
133 MAPKs and controls their activities (Schweighofer *et al.*, 2007; Umbrasaite *et*  
134 *al.*, 2010). AP2C1 is induced by wounding and biotic stress, and functions as  
135 a negative regulator of MPK3, MPK4 and MPK6 controlling levels of wound-  
136 induced jasmonate and ethylene (ET) as well as plant immunity (Galletti *et al.*,  
137 2011; Schweighofer *et al.*, 2007; Shubchynskyy *et al.*, 2017; Sidonskaya *et*  
138 *al.*, 2016). *ap2c1* plants do not display obvious developmental phenotypes  
139 under standard growth conditions (Schweighofer *et al.*, 2007), implying  
140 specific AP2C1 function under stress conditions and contribution of other,  
141 presently unknown, MAPK phosphatases for MAPK control in the absence of  
142 AP2C1.

143 Activation of transcription factors (TFs) and changes of gene expression  
144 are part of the cellular response to a perceived signal in order to reprogram  
145 cellular processes (Rauf *et al.*, 2013). A number of TFs, including WRKY and  
146 AP2-domain/ethylene-responsive factor (AP2/ERF) family members, have  
147 been suggested or demonstrated to act downstream of MAPKs in plants (Asai  
148 *et al.*, 2002; Bethke *et al.*, 2009; Guan *et al.*, 2014; Kim and Zhang, 2004; Li  
149 *et al.*, 2012; Mao *et al.*, 2011; Meng and Zhang, 2013; Menke *et al.*, 2005;  
150 Nakano *et al.*, 2006; Popescu *et al.*, 2009). Subsequently, these proteins may  
151 constitute an important link between pathogen- or wound-induced MAPK  
152 signalling and downstream transcriptional reprogramming.

153 Considering the broad spectrum of signals transmitted by the same  
154 MAPKs (Meng and Zhang, 2013; Rodriguez *et al.*, 2010), such as MPK6, it is

155 puzzling how the specificity of the responses for perceived stimuli is  
156 generated. The phylogenetic diversity and distinct enzymatic mechanisms of  
157 protein phosphatases that are able to inactivate MAPKs support the idea of a  
158 contribution of MAPK phosphatases to the versatility and specificity of MAPK  
159 networks. Here, we investigate the roles of the phylogenetically distant  
160 Arabidopsis MAPK phosphatases AP2C1 and MKP1 and, in particular, their  
161 functional redundancies. We show that AP2C1 and MKP1 together repress  
162 plant autoimmune-like responses, including salicylic acid (SA) and ET  
163 accumulation, and early senescence. These observations in the *ap2c1 mkp1*  
164 mutant are underlined by the misexpression of specific transcription factors,  
165 including members of the *WRKY*, *AP2/ERF*, and Arabidopsis NAM, ATAF,  
166 and CUC (*ANAC*) families whose expression is – at least partially – mediated  
167 by MPK6.

168

## 169 **Materials and methods**

### 170 **Plant lines, genetic crosses and growth conditions**

171 All plant lines used in this study were in the *Arabidopsis thaliana* accession  
172 Columbia (Col-0), with *mkp1* being an introgression line from a Wassilewskija  
173 background (Bartels *et al.*, 2009). The T-DNA insertion line *ap2c1*  
174 (SALK\_065126; (Schweighofer *et al.*, 2007)) was crossed with the T-DNA  
175 insertion lines *ptp1* (SALK\_118658) and *mkp1*, respectively, to generate the  
176 *ap2c1 ptp1* and *ap2c1 mkp1* double mutants. *mpk6-2* (SALK\_073907) was  
177 used for genetic crosses generating *ap2c1 mkp1 mpk6*. The T-DNA insertion  
178 lines *ap2c2* (GABI-Kat\_316F11) and *ap2c3* (SALK\_109986) (Umbrasaite *et*  
179 *al.*, 2010) were crossed with *mkp1* to generate *ap2c2 mkp1* and *ap2c3 mkp1*  
180 double mutants. Combinatorial mutants were identified in the F2 generation  
181 and also confirmed in subsequent generations by PCR genotyping using T-  
182 DNA- and gene-specific primers (Bartels *et al.*, 2009; Schweighofer *et al.*,  
183 2007; Umbrasaite *et al.*, 2010). For protein and RNA extraction, as well as for  
184 ET and SA measurements, plants were grown on soil for five to seven weeks  
185 in a phytotron chamber under short-day conditions (8 h light, 22°C/16 h dark,  
186 20°C cycle).

187 For experiments at the seedling stage, seeds were surface sterilized and  
188 spread on plates containing half-strength MS (Murashige and Skoog) medium

189 (Duchefa), pH 5.7, 1% (w/v) sucrose and 0.7% plant agar (w/v; Duchefa).  
190 Seedlings were grown in long-day conditions (16 h light/8 h dark) at 22°C. If  
191 indicated, *ap2c1 mkp1* plants were kept at 26°C during day and 22°C at night  
192 with 95% humidity and short-day conditions (8 h light/16 h dark).

193

#### 194 ***Ex vivo* kinase activity assay and MAPK immunoblotting**

195 Plant protein extraction and the *ex vivo* kinase assay were performed as  
196 described (Schweighofer *et al.*, 2007; Schweighofer *et al.*, 2009) using  
197 polyclonal antibodies for immunoprecipitation and myelin basic protein (MBP)  
198 as *in vitro* substrate of immunoprecipitated MAPKs. MAPK protein amounts  
199 were visualised with Sigma antibodies Anti-AtMPK3 (M8318), Anti-MPK4  
200 (A6979) and Anti-AtMPK6 (A7104).

201

#### 202 **RNA extraction and quantitative reverse-transcription PCR (RT-qPCR)**

203 Total RNA from leaves was isolated with the RNeasy Plant Mini Kit (Qiagen)  
204 and treated with TURBO DNA-free DNaseI (Ambion) according to the  
205 manufacturers' instructions. RNA integrity was checked on 1% (w/v) agarose  
206 gels and the concentration measured before and after DNase I digestion. The  
207 absence of genomic DNA was verified by PCR using primers targeting an  
208 intron of the control gene *At5g65080*. cDNA synthesis was performed using  
209 First Strand cDNA Synthesis Kit (Thermo Scientific). The efficiency of cDNA  
210 synthesis was estimated by RT-qPCR analysis using a primer pair amplifying  
211 the 3' part of the control gene encoding GAPDH and a primer pair amplifying  
212 the 5' part of the same gene. RT-qPCR reactions were performed as  
213 described previously (Balazadeh *et al.*, 2008). *ACTIN2* was selected as a  
214 reference gene for which four replicates were measured in each PCR run, and  
215 their average cycle threshold (CT) was used for relative expression analyses.  
216 TF expression data were normalized by subtracting the mean *ACTIN2* gene  
217 CT value from the CT value ( $\Delta$ CT) of each gene of interest. The expression  
218 value in the comparison between different genotypes was calculated using the  
219 expression  $2^{-\Delta\Delta CT}$ , where  $\Delta\Delta CT$  represents  $\Delta CT$  mutant of interest minus  $\Delta CT$   
220 control (wild type, WT). For TF expression profiling, an advanced version of  
221 an expression profiling platform (Balazadeh *et al.*, 2008) that was originally  
222 described by (Czechowski *et al.*, 2004) was used, covering 1,880 Arabidopsis



223 TF genes. Statistical analysis was performed with the JASP software  
224 (<https://jasp-stats.org>; version 0.14.1).

225

### 226 **ET measurements, quantification of total SA and camalexin**

227 ET measurements were performed by gas chromatography (Hewlett Packard  
228 5890 Series II) with an Al<sub>2</sub>O<sub>3</sub> column (Agilent Technologies). Whole rosettes  
229 of 4-week-old plants grown in long-day conditions were taken, leaves  
230 wounded, transferred into 20-mL vials containing 4 mL half-strength MS  
231 medium with 0.8% (w/v) plant agar, in order to reduce the volume of the head  
232 space, and air-tightly sealed. After 24 h, 100 µL of the gas phase were taken  
233 from the vials and analysed by gas chromatography–flame ionization  
234 detection (GC-FID). ET production was calculated per hour and milligram of  
235 fresh tissue.

236 Total SA was quantified as described previously (Rozhon *et al.*, 2005) except  
237 that 20 µM EDTA was added to the HPLC eluent. Camalexin levels were  
238 determined as described previously (Shubchynskyy *et al.*, 2017).

239

### 240 **AGI codes**

241 The AGI codes of the genes analysed in this report are:

242 At1g01010, At1g02220, At1g02250, At1g02340, At1g04240, At1g04370,  
243 At1g07160, At1g08320, At1g13300, At1g18570, At1g18860, At1g18860,  
244 At1g19210, At1g29860, At1g36060, At1g52830, At1g62300, At1g66560,  
245 At1g66560, At1g67100, At1g69600, At1g71520, At1g71860, At1g74080,  
246 At1g75250, At1g80840, At2g01200, At2g30020, At2g33710, At2g37430,  
247 At2g38250, At2g38340, At2g38470, At2g40180, At2g40470, At2g40740,  
248 At2g40740, At2g43000, At2g43140, At2g43790, At2g47520, At3g01970,  
249 At3g04070, At3g13840, At3g15320, At3g15500, At3g21330, At3g23230,  
250 At3g23240, At3g23250, At3g26790, At3g26830, At3g44350, At3g45640,  
251 At3g46080, At3g46090, At3g50510, At3g53600, At3g55270, At4g01370,  
252 At4g01720, At4g01720, At4g18170, At4g18870, At4g23810, At4g32280,  
253 At4g36990, At5g01900, At5g04390, At5g13080, At5g13330, At5g15160,  
254 At5g19520, At5g20240, At5g22570, At5g23000, At5g24110, At5g27810,  
255 At5g39860, At5g43290, At5g43650, At5g44260, At5g45890, At5g46350,



256 At5g51790, At5g56840, At5g56960, At5g59820, At5g64750, At5g64810,  
257 At5g67450.

258

259

## 260 **Results**

### 261 **Double *ap2c1 mkp1* mutant plants show growth and development** 262 **defects which are at least partially mediated by MPK6**

263 To investigate the specific and/or overlapping roles of the MAPK  
264 phosphatases AP2C1 and MKP1, we took advantage of the Arabidopsis T-  
265 DNA insertion knock-out mutants *ap2c1* and *mkp1*, respectively (Bartels *et al.*,  
266 2009; Schweighofer *et al.*, 2007). Phenotypically, *ap2c1* and *mkp1* mutant  
267 plants did not show any difference compared to WT when grown for up to five  
268 weeks under short-day conditions (Figure 1A, 1C, 1E). However, long-day  
269 *mkp1* plants demonstrated altered morphology, such as aberrant leaf  
270 development and early senescence, which appeared approximately three  
271 weeks after germination (Supplementary Figure 1A), as described previously  
272 (Bartels *et al.*, 2009).

273 To further analyse AP2C1 and MKP1 functions in plants, we generated a  
274 double mutant by genetic crossing. *ap2c1 mkp1* plants showed phenotypic  
275 differences compared to WT and single mutants. These appeared two weeks  
276 after germination under standard growth conditions in soil; first their sizes  
277 started differing, and during further growth *ap2c1 mkp1* plants revealed more  
278 pronounced multiple defects, including severe dwarfism and aberrant leaf  
279 development (Figures 1A, 1B, 1C). Four weeks after germination, phenotypic  
280 abnormalities became even more evident as early senescence, spontaneous  
281 macroscopic lesions and abnormal leaf morphology. Interestingly, these  
282 developmental defects were suppressed when plants were grown under  
283 conditions of elevated humidity and increased temperature (Figure 1D),  
284 indicating a dependency on environmental cues. However, during flowering,  
285 misshaped inflorescences and strongly reduced fertility were always observed  
286 (Supplementary Figure 2D, 2E). These phenotypes were specific for *ap2c1*  
287 *mkp1* plants, as crossing *ap2c1* with *ptp1* did not lead to phenotypic  
288 alterations (Figure 1E) compared with *mkp1 ptp1* (Bartels *et al.*, 2009).  
289 Crossing *mkp1* with either of two other clade B AP2C mutants, *ap2c2* or

290 *ap2c3* (Umbrasaitė *et al.*, 2010), led to mild phenotypes compared with the  
291 strong defects of *ap2c1 mkp1* plants (Supplementary Figure 1B, C).

292 Since MPK6 is a documented target of action by AP2C1 and MKP1  
293 (Schweighofer *et al.*, 2007; Ulm *et al.*, 2002) we set to address the impact of  
294 MPK6 on phenotypic aberrations detected in *ap2c1 mkp1* plants. To this goal,  
295 triple mutant plants *ap2c1 mkp1 mpk6* were created and their phenotype was  
296 compared with that of *ap2c1 mkp1*. The phenotype of *ap2c1 mkp1 mpk6*  
297 plants was more similar to WT than to *ap2c1 mkp1*. The loss of MPK6  
298 suppressed most phenotypic defects observed in *ap2c1 mkp1*, such as  
299 extreme dwarfism, aberrant leaf shapes, premature leaf senescence and  
300 impaired fertility (Figure 1C). However, at later developmental stages, *ap2c1*  
301 *mkp1 mpk6* plants appeared overall smaller than WT and displayed  
302 senescence in the older leaves (Supplementary Figures 1C, 2G).

303 Overall, these results suggest that AP2C1 and MKP1 protein  
304 phosphatases act partially redundantly and that the presence of at least either  
305 gene is necessary for normal plant development. The phenotypes observed in  
306 *ap2c1 mkp1* plants are predominantly MPK6-dependent.

307

### 308 **Dual control of wound-induced MAPK activities by AP2C1 and MKP1**

309 Our previous work has revealed the involvement of AP2C1 in the regulation of  
310 MAPK activities induced by pathogen-associated molecular patterns (PAMP),  
311 wounding, and nematodes (Schweighofer *et al.*, 2007; Shubchynskyy *et al.*,  
312 2017; Sidonskaya *et al.*, 2016). To check for a potential overlapping role by  
313 MKP1, we firstly analysed MPK3, MPK4 and MPK6 activities after wounding  
314 the leaves of WT and of the single mutant plants *ap2c1* and *mkp1*. Kinase  
315 activities were assayed after immunoprecipitation from total protein extracts  
316 using specific antibodies. In agreement with our previous findings  
317 (Schweighofer *et al.*, 2007), *ap2c1* plants showed higher and sustained  
318 wound-induced activities of MPK3, MPK4 and MPK6 compared to WT (Figure  
319 2). Interestingly, MPK4 activity was more intense and sustained in *ap2c1*  
320 compared to the *mkp1* plants, indicating a specific role of AP2C1 in the  
321 regulation of MPK4 during wounding. MPK3 activity in *ap2c1* plants was  
322 slightly enhanced and more sustained in comparison to WT and *mkp1*. In  
323 *mkp1* plants, however, the MPK6 peak activity was shifted to an earlier time

324 point compared to WT. In *ap2c1 mkp1* plants we detected strongly and  
325 moderately enhanced basal activity of MPK4 and MPK6, respectively,  
326 whereas basal activity of MPK3 was not affected in comparison to WT or  
327 single mutant lines. The stronger and more sustained wound-induced  
328 activation of MAPKs observed in single-mutant plants was additionally  
329 enhanced in the double mutant *ap2c1 mkp1* (Figure 2). The MPK3, MPK4,  
330 and MPK6 protein levels were comparable in both mutants and WT (Figure 2).

331 *MKP1* has been reported to be constitutively expressed (Ulm *et al.*,  
332 2002), whereas *AP2C1* is transcriptionally responsive to stress (Schweighofer  
333 *et al.*, 2007; Sidonskaya *et al.*, 2016). We tested whether reciprocal  
334 compensational expression may occur in long-day conditions and thus  
335 analysed *AP2C1* and *MKP1* mRNA levels in *mkp1* and *ap2c1* mutants,  
336 respectively. RT-qPCR analyses showed only very slightly enhanced  
337 expression of *MKP1* in *ap2c1* plants, whereas the expression of *AP2C1* was  
338 approximately 160% in *mkp1* plants compared to WT (Figure 3), suggesting a  
339 compensatory transcriptional activation of *AP2C1* in the absence of *MKP1*.

340 Our results suggest cooperative action and partial redundancy in the  
341 regulation of MAPKs by these two evolutionary distant and unrelated MAPK  
342 phosphatases.

343

### 344 ***AP2C1* and *MKP1* play partially redundant roles in the control of wound-**

### 345 **induced ET synthesis**

346 Enhanced ET production is an early response of plants subjected to  
347 biotic/abiotic stresses (Ju and Chang, 2012; Wang *et al.*, 2002). We have  
348 previously shown that ectopic expression of *AP2C1* suppresses MPK6  
349 activation and wound-induced ET production in plant leaves (Schweighofer *et al.*  
350 *et al.*, 2007). Since both *AP2C1* and *MKP1* control MPK6 activity, a major  
351 determinant in the regulation of ET biosynthesis (Li *et al.*, 2012; Liu and  
352 Zhang, 2004), we analysed wound-induced ET amounts in leaves of WT,  
353 *ap2c1*, *mkp1*, *ap2c1 mkp1* and *ap2c1 mkp1 mpk6* plants. As reported earlier  
354 (Schweighofer *et al.*, 2007), wound-induced ET amounts were similar in  
355 *ap2c1* and WT (Figure 4A). However, significantly higher levels of ET  
356 accumulated in wounded *mkp1* plants and even more so in the *ap2c1 mkp1*  
357 double mutant (Figure 4A). Our data suggest a primary role of *MKP1* in the

358 control of wound-triggered ET production and that although disruption of  
359 AP2C1 alone is not sufficient to alter ET production upon wounding, it  
360 contributes significantly to the regulation of ET amounts in the absence of  
361 MKP1. Interestingly and in agreement with the overall milder phenotype,  
362 wound-induced ET accumulation in *ap2c1 mkp1 mpk6* plants was similar to  
363 levels detected in WT (Figure 4A).

364 The transcriptional regulation of 1-aminocyclopropane-1-carboxylic  
365 synthase (ACS) enzymes contributes to control ET production (Li *et al.*, 2012).  
366 Therefore, we quantified the transcripts of ACS6, the expression of which is  
367 significantly induced after pathogen attack (Li *et al.*, 2012) and wounding (Li *et*  
368 *al.*, 2018). Compared to WT, no changes in ACS6 transcript levels were  
369 detected in *ap2c1*, slightly higher levels in *mkp1*, and a nine-fold increase in  
370 *ap2c1 mkp1* which was reduced to WT levels in *ap2c1 mkp1 mpk6* plants  
371 (Figure 4B). Thus, our data show that ACS6 is more expressed in *ap2c1*  
372 *mkp1* plants, which likely contributes to the elevated amounts of ET upon  
373 wounding, and that both effects are mediated by MPK6.

374 Taken together, the wound-induced MAPK activities, expression patterns  
375 and effects on ET production suggest that AP2C1 and MKP1 have both  
376 distinct as well as overlapping functions in wounded leaves.

377

### 378 **TF gene expression is de-regulated in *ap2c1 mkp1* plants**

379 To investigate if and how AP2C1 and MKP1 influence the regulation of gene  
380 expression under standard growth conditions, we used a RT-qPCR platform  
381 for high-throughput expression profiling of 1,880 Arabidopsis TF-encoding  
382 genes (Balazadeh *et al.*, 2008). We selected genes showing an at least three-  
383 fold mean difference of expression levels in *ap2c1*, *mkp1* or *ap2c1 mkp1*  
384 plants when compared to WT. We identified three genes encoding TFs that  
385 were deregulated in *ap2c1*, but not in *mkp1* (Supplementary Table I), while 25  
386 genes were deregulated in *mkp1*, but not in *ap2c1* (Supplementary Table II),  
387 and four genes concomitantly regulated by AP2C1 and MKP1 (Supplementary  
388 Table III). Figure 5 shows the number of genes whose expression levels were  
389 changed in *ap2c1*, *mkp1* or *ap2c1 mkp1* plants, compared to the WT. The TF  
390 genes dysregulated in the double mutant, and their expression values relative  
391 to the WT, are represented in Supplementary Table IV. The deregulation of 76

392 TF-encoding genes (58 upregulated, 18 downregulated) was found  
393 reproducibly in at least three different experiments in *ap2c1 mkp1* double  
394 mutant plants. Among them, genes encoding members of the WRKY family  
395 were most abundant: 15 WRKY genes were upregulated (Figure 6,  
396 Supplementary Table IV) and one downregulated (Supplementary Table IV).  
397 A further prevalent group of TF-encoding genes affected in *ap2c1 mkp1*  
398 plants includes AP2/ERF described for their involvement in development,  
399 including *RAP2.6L* (Yang *et al.*, 2018) and *WIND3* (Smit *et al.*, 2020) (Figure  
400 7). ANAC TF family members are implicated in senescence and stress-related  
401 processes (Bu *et al.*, 2008; Jensen *et al.*, 2010; Saga *et al.*, 2012; Wu *et al.*,  
402 2012). Our results show that several ANAC TF-encoding genes are  
403 upregulated in *ap2c1 mkp1* plants (Figure 8). Thus, our data suggest a  
404 cooperative function of AP2C1 and MKP1 in the transcriptional regulation of a  
405 set of WRKY, AP2/ERF and ANAC genes in the WT.

406 Our observation that *ap2c1 mkp1 mpk6* plants are phenotypically much  
407 less affected than *ap2c1 mkp1* double mutants suggested that severe  
408 phenotypic aberrations in the latter are mediated by MPK6. This prompted us  
409 to investigate *ap2c1 mkp1 mpk6* plants for the expression of TFs  
410 misregulated in *ap2c1 mkp1*. Indeed, 50 of the 76 TF genes strongly affected  
411 in *ap2c1 mkp1* plants were not altered in their expression in *ap2c1 mkp1*  
412 *mpk6*, linking MPK6 over-activation to their misexpression. Among these,  
413 expression of *WRKY6*, *WRKY28*, *WRKY33* and *WRKY45* (Figure 6B), the  
414 AP2/ERF family members *RAP2.6L*, *WIND3*, *ERF1*, *DREB19*, *ERF14*, and  
415 *ERF17* (Figure 7), and of several ANAC TF-encoding genes, such as  
416 *ANAC005*, *ANAC042*, *ANAC003*, *ANAC047*, and *ANAC055* (Figure 8) are  
417 dependent on the presence of MPK6. The expression of *WRKY75*, *WRKY71*,  
418 *WRKY38* and *WRKY30* (Figure 6), and of the AP2/ERF genes *At2g33710*,  
419 *At1g71520* and *At3g23230* remained upregulated more than 5-fold in the  
420 absence of MPK6 in *ap2c1 mkp1 mpk6* plants (Figure 7), suggesting that  
421 regulation of these TFs is controlled by other factors (possibly other MAPKs).

422

423 **Defence responses, camalexin, SA and the senescence marker gene**  
424 ***SENESCENCE-ASSOCIATED GENE12 (SAG12)* are upregulated in *ap2c1***  
425 ***mkp1* plants**

426 It has been shown previously that *mkp1* plants accumulate higher levels of the  
427 phytoalexin camalexin (Bartels *et al.*, 2009). To investigate if the expression of  
428 genes encoding camalexin biosynthesis enzymes was affected in *ap2c1 mkp1*  
429 plants, we studied the expression of a key gene in the pathway,  
430 *CYP71B15/PAD3*. A strong upregulation (more than 300-fold, respectively)  
431 was detected in *ap2c1 mkp1* plants compared to WT (Figure 9). Moreover,  
432 *ap2c1 mkp1 mpk6* plants still had remarkably high transcript levels  
433 (upregulation ca. 10-fold) of *CYP71B15/PAD3*, showing that MPK6 is an  
434 important, but not the sole factor behind its upregulation in *ap2c1 mkp1*  
435 plants. Also, *mkp1* single mutant plants showed a >10-fold upregulation of the  
436 gene (Figure 9A).

437 To investigate if the increased *CYP71B15/PAD3* expression level correlates  
438 with camalexin accumulation, total camalexin was quantified in WT and  
439 mutant plants. Indeed, in agreement with previous findings (Bartels *et al.*,  
440 2009) we found increased camalexin levels in *mkp1* plants and very high  
441 camalexin accumulation in the *ap2c1 mkp1* mutant, which was not solely  
442 dependent on MPK6 (Figure 9B).

443 Upregulation of MAPK activities and macroscopic lesion formation in  
444 leaves of *ap2c1 mkp1* indicated the possible activation of a hypersensitive-like  
445 response in these plants. Since this is associated with the accumulation of the  
446 stress hormone SA, we measured SA in leaves of *ap2c1 mkp1*, *ap2c1 mkp1*  
447 *mpk6* as well as in WT and single mutants. Indeed, we found a 35-fold  
448 increase of SA in *ap2c1 mkp1* plants compared to WT (Figure 10), whereas  
449 *ap2c1*, *ap2c1 mkp1 mpk6*, and *mpk6* plants showed SA amounts similar to  
450 the WT. In agreement with previous data (Bartels *et al.*, 2009), we detected  
451 enhanced total SA amounts (>2-fold) also in *mkp1* plants compared to WT  
452 (Figure 10).

453 Leaf necrosis observed in *ap2c1 mkp1* leaves (Figure 1B) and the  
454 upregulation of *WRKY6* (Figure 6B), which is a senescence-related marker  
455 gene (Rushton *et al.*, 2010), suggested that early senescence was induced in  
456 these plants. Thus, we investigated the expression of the senescence-specific  
457 marker gene *SAG12* (Noh and Amasino, 1999) and found that it strongly  
458 upregulated in *ap2c1 mkp1* plants, dependent on MPK6 (Figure 11). This data



459 along with the upregulation of *WRKY6* (Figure 6B) indicates aberrant, early  
460 induction of senescence-related processes in the double phosphatase mutant.

461

462

463

464

## 465 **Discussion**

466

### 467 **Coordinated control of MAPK activities by AP2C1 and MKP1**

468 Acclimation for survival is a fundamental principle, which relies on intracellular  
469 signalling in every organism. Different signals converge at the level of MAPK  
470 cascades, and from there diverge into a range of different downstream  
471 pathways and responses (Andreasson and Ellis, 2010; Rasmussen *et al.*,  
472 2012; Rodriguez *et al.*, 2010). Considering the broad spectrum of signals  
473 transduced by overlapping players of MAPK pathways it is puzzling how  
474 response specificity is attained (Lampard *et al.*, 2009; Meng and Zhang, 2013;  
475 Rodriguez *et al.*, 2010). Several signalling scenarios have been investigated  
476 that could help explain pathway specificity, including activity-dependent  
477 kinase distribution and localization, protein complex formation (e.g. interaction  
478 with scaffolding proteins), and dephosphorylation by protein phosphatases  
479 (Krysan and Colcombet, 2018). Over the last decades mainly the functions of  
480 MPK3/MPK4/MPK6 in diverse pathways have been described, indicating  
481 them as both points of divergence and integration hubs in cellular signalling  
482 (Bigeard and Hirt, 2018; Peng *et al.*, 2018).

483 Here, we provide evidence that two evolutionarily distinct MAPK  
484 phosphatases control stress-related signalling in Arabidopsis by inactivating  
485 an overlapping set of target MAPKs that mediate stress and defence  
486 responses. The Ser/Thr PP2C phosphatase AP2C1 and the dual-specificity  
487 phosphatase MKP1 contribute to ensure appropriate inactivation of MAPKs  
488 during stress. Both AP2C1 and MKP1 target MPK3, MPK4 and MPK6  
489 (Anderson *et al.*, 2011; Bartels *et al.*, 2009; Galletti *et al.*, 2011; Schweighofer  
490 *et al.*, 2007; Shubchynskyy *et al.*, 2017; Sidonskaya *et al.*, 2016; Ulm *et al.*,  
491 2002). Enhanced activation of MAPKs by wounding and constitutive stress  
492 signalling in the absence of stress in *ap2c1 mkp1* plants indicate that the lack



493 of both MAPK phosphatases creates a shortfall downstream of MAPKs,  
494 exemplified by deregulated expression of TF-encoding genes.

495 An enhanced kinase activity in *mkp1* plants *versus* WT at the earlier time  
496 points after wounding compared to *ap2c1* *versus* WT suggests that the  
497 contribution of MKP1 to inactivating MAPKs is already set before wounding, or  
498 during a very early stage of signalling. On the contrary, AP2C1 adds to MAPK  
499 inactivation at later time points. It is possible that AP2C1 is primarily  
500 responsible for keeping the stress-induced activation below a certain  
501 threshold and controlling the duration of kinase activation during acute stress  
502 acting as an “emergency brake”, while MKP1 is predominantly responsible for  
503 suppressing kinase activities under normal conditions, providing a  
504 “constitutive brake”. This hypothesis is supported by the demonstrated  
505 induction of *AP2C1* expression by a plethora of stresses, while *MKP1* shows  
506 comparatively marginal changes in expression  
507 (<https://www.genevestigator.com>). These observations are also consistent  
508 with a recent comprehensive analysis of the Arabidopsis proteome, which  
509 covers more than 14,000 proteins and where in ambient conditions the overall  
510 MKP1 abundance outnumbered by far that of AP2C1  
511 (<http://athena.proteomics.wzw.tum.de/>) (Mergner *et al.*, 2020), underlining the  
512 rather specific role of AP2C1 under stress conditions. The AP2C1 paralogues  
513 AP2C2 and AP2C3 (Schweighofer *et al.*, 2014; Umbrasaite *et al.*, 2010;  
514 Umbrasaite *et al.*, 2011) as well as MKP1 and PTP1 interact with the same  
515 MAPKs and dephosphorylate them to various extents (Bartels *et al.*, 2009).  
516 However, the rather mild phenotypes of *ap2c2 mkp1* and *ap2c3 mkp1* plants  
517 and the WT-like appearance of *ap2c1 ptp1* (this work) compared to *ap2c1*  
518 *mkp1* plants clearly indicate specific genetic interactions and redundant  
519 functions of the evolutionary distant AP2C1 and MKP1 phosphatases in the  
520 regulation of signalling pathways.

521

### 522 **Manifestation of cell death in *ap2c1 mkp1* plants**

523 The lesions in leaves of *ap2c1 mkp1* plants suggest autoimmune-like  
524 responses most likely caused by misregulation of MAPKs and/or failed control  
525 of guarding resistance (R) proteins (Rodriguez *et al.*, 2016). AP2C1 and  
526 MKP1 share the target MAPKs MPK3, MPK4 and MPK6, where MPK4 and

527 some of its upstream MAPK cascade members were originally described as  
528 negative regulators of plant immunity based on their mutant plant phenotypes,  
529 for example MEKK1 and MKK1/2 (Petersen *et al.*, 2000; Rasmussen *et al.*,  
530 2012). The improper activation of the *R*-gene *SUMM2* is mainly responsible  
531 for the phenotypical defects of the *mpk4* mutant and of other mutant plants in  
532 the pathway, identifying the MEKK1-MKK1/2-MPK4 module as a positive  
533 regulator of stress responses (Zhang *et al.*, 2012). Similar observations  
534 connecting phosphatase-targeted MAPKs with autoimmune-like phenotypes  
535 have been made by ectopically expressing constitutively active MPK3 (Genot  
536 *et al.*, 2017) or by inducibly expressing MKK5, which activates MPK3 and  
537 MPK6 (Lassowskat *et al.*, 2014). Both approaches led to a plethora of  
538 phenotypic and molecular changes including dwarfism, lesion formation, de-  
539 repression of defence gene expression, and the accumulation of stress  
540 hormones, similar to the *ap2c1 mkp1*-related phenotypes described in this  
541 work (see Results).

542 The single *mkp1* and the double *mkp1 ptp1* mutants show constitutive  
543 defence responses including increased levels of SA and camalexin,  
544 suggesting partially overlapping functions of MKP1 and PTP1 in repressing  
545 SA biosynthesis (Bartels *et al.*, 2009). Similarly, the strong accumulation of  
546 SA and camalexin in *ap2c1 mkp1* compared to *mkp1* plants suggests a  
547 collaborative action of both AP2C1 and MKP1 as negative regulators of SA  
548 and camalexin production (this work). This accumulation is probably MPK6-  
549 dependent, as the introduction of the *mpk6* mutation in *ap2c1 mkp1 mpk6*  
550 plants restores SA and camalexin levels similar to those of WT and *mkp1 ptp1*  
551 *mpk6* mutant (Bartels *et al.*, 2009). Notably, rescue of the severe *ap2c1 mkp1*  
552 growth phenotypes by elevated temperature is in accordance with the  
553 observed temperature dependency of SA-related phenotypes (Ichimura *et al.*,  
554 2006; Su *et al.*, 2007; Suarez-Rodriguez *et al.*, 2007), as well as with the  
555 suppression of *SNC1* expression and reduction of *SNC1* activity by high  
556 temperature (Yang and Hua, 2004; Zhu *et al.*, 2010). The resistance protein  
557 *SNC1* is a modifier of *mkp1* in the Col-0 accession, where partial rescue of  
558 *mkp1* and *mkp1 ptp1* growth phenotypes by a loss-of-function *snc1* mutation  
559 indicates a sensitized *SNC1* signaling pathway in the absence of MKP1  
560 (Bartels *et al.*, 2009).

561 Previous findings that SA acts together with ET to regulate cell death  
562 (Rao *et al.*, 2002), the requirement of ET biosynthesis for H<sub>2</sub>O<sub>2</sub> accumulation  
563 and subsequent cell death (Overmyer *et al.*, 2003), and the induction of cell  
564 death in Arabidopsis leaves by persistent activation of MAPKs with gain-of-  
565 function MKK4 and MKK5 (Ren *et al.*, 2002) all correlate with the cell death  
566 phenotype observed in the *ap2c1 mkp1* mutant, where MAPKs - and other  
567 stress-related factors - may be (hyper)-activated. Therefore, we conclude that  
568 the majority of the phenotypes observed in *ap2c1 mkp1* plants, both visible  
569 and molecular, are due to the misregulation of MAPK pathways, even in the  
570 absence of stress.

571

### 572 **AP2C1 and MKP1 affect MAPK-regulated ET biosynthesis**

573 Activated MPK6 controls ET levels by both inducing the transcription of ACS  
574 family genes and by phosphorylating ACS proteins, the rate-limiting enzymes  
575 in ET biosynthesis. Phosphorylated ACSs become more stable and, thus, ET  
576 synthesis is enhanced by elevated MPK6 activity (Kim *et al.*, 2003; Li *et al.*,  
577 2012; Liu and Zhang, 2004; Xu *et al.*, 2008). In *ap2c1 mkp1*, the enhanced ET  
578 production is certainly due to, at least in part, the highly increased expression  
579 of *ACS6* compared to WT. A considerable additive effect on ET  
580 overproduction by the double *ap2c1 mkp1* mutation suggests that even  
581 though MKP1 is a determining MAPK phosphatase affecting ET production,  
582 there are overlapping and non-redundant functions of AP2C1 and MKP1 in  
583 the regulation of stress-induced ET biosynthesis. Detection of enhanced and  
584 MPK6-dependent expression of *WRKY33*, encoding a TF that binds to the  
585 promoter of ACS genes and is a substrate of MPK3/MPK6, suggests an  
586 involvement of *WRKY33* itself in ACS overexpression in *ap2c1 mkp1* plants  
587 (this work and (Li *et al.*, 2012)). The identification of genes encoding TFs of  
588 the AP2/ERF family members (ET-responsive element-binding proteins)  
589 among the uppermost induced ones in *ap2c1 mkp1* plants suggests a path to  
590 enhanced ET amounts in these plants.

591

### 592 **AP2C1 and MKP1 control the expression of stress-responsive TF-** 593 **encoding genes, predominantly via MPK6**

594 Transcriptional reprogramming in response to activated MAPK signalling  
595 suggests an involvement of TFs. Our results indicate that the concomitant  
596 lack of the MAPK regulators AP2C1 and MKP1 results in elevated basal  
597 MAPK activities and leads to highly enhanced expression of *WRKY* TF genes,  
598 in some cases by more than hundred-fold compared to WT. The *ap2c1 mkp1*  
599 mutant phenotypes and the described functions of some upregulated *WRKYs*  
600 indicate that stress responses are constitutively active in these plants. This  
601 correlates with reports demonstrating an involvement of *WRKYs* in oxidative  
602 stress responses, in the induction of ET and camalexin biosynthesis  
603 (*WRKY30*, *WRKY33*), in the response to pathogens (*WRKY71*, *WRKY40*), in  
604 basal defence (*WRKY38*, *WRKY42*), and defence- and senescence-related  
605 processes (*WRKY6*) (Rushton *et al.*, 2010).

606 Direct feedback mechanisms among *WRKYs* themselves have been  
607 shown (Mao *et al.*, 2011) and are generally proposed, where *WRKYs*  
608 positively auto-regulate their own gene expression and/or cross-regulate  
609 expression of other *WRKY* genes (Birkenbihl *et al.*, 2017; Mao *et al.*, 2011;  
610 Pandey and Somssich, 2009). Thus, it could be that the enhanced activation  
611 of MAPKs in *ap2c1 mkp1* plants leads to phosphorylation and thus activation  
612 of MAPK target *WRKY* proteins, which serve as activated TFs for a further  
613 series of *WRKY* genes. In any case, MPK6 seems to be a major player  
614 responsible for mediating the upregulation of several *WRKYs*, *AP2/ERFs*,  
615 *ANACs* and other TF-encoding genes. MPK6 controls the expression of  
616 several *WRKYs* to different extents, as shown in *ap2c1 mkp1* plants  
617 compared to *ap2c1 mkp1 mpk6* (Figure 6A). This data demonstrates that not  
618 only MPK6 but also other factor(s) affect *WRKY* gene expression. MPK3, as  
619 the closest paralogue of MPK6, may be a possible candidate, since MPK3 is  
620 also more strongly activated in *ap2c1 mkp1* than in the respective single  
621 mutant plants. We confirmed MPK6-dependent *WRKY33* expression (Mao *et al.*  
622 *et al.*, 2011); however, the higher MPK4 activities in *ap2c1 mkp1* may also lead  
623 to higher amounts of active *WRKY33* protein (Birkenbihl *et al.*, 2017; Qiu *et al.*  
624 *et al.*, 2008). Thus, our data suggest that AP2C1 and MKP1 may play a dual role  
625 in regulating camalexin biosynthesis, on the one hand by controlling MPK6  
626 activity, which positively regulates *WRKY33* expression, and on the other by

627 controlling MPK4 activity, which in turn stimulates WRKY33 leading to  
628 transactivation of *CYP71B15/PAD3*.

629 A PAMP-activated MPK3/MPK6 pathway was previously reported to  
630 elevate *WRKY22* and *WRKY29* expression (Asai *et al.*, 2002). Strongly  
631 enhanced MPK3/MPK6 activities, but unaffected expression of either  
632 *WRKY22* or *WRKY29* in untreated *ap2c1 mkp1* plants, show that for  
633 *WRKY22/29* overexpression the MPK6 hyperactivation is sufficient (Asai *et*  
634 *al.*, 2002) but not necessary (this work) and that other factors (possibly  
635 MAPKs) may be playing a role instead of MPK6.

636

### 637 **Senescence is repressed by AP2C1 and MKP1 phosphatases in an** 638 **MPK6-dependent way**

639 Several lines of evidence indicate that the *ap2c1 mkp1* mutant undergoes  
640 precocious senescence. Leaf senescence is a highly regulated process that  
641 finally leads to cell death and tissue disintegration, at the same time  
642 contributing to the fitness of the whole plant. Senescence is controlled by  
643 endogenous and environmental cues, and can be triggered prematurely by  
644 different abiotic/biotic stresses due to pathogen attack, wounding, UV light  
645 irradiation, and high ozone levels (Hanfrey *et al.*, 1996; He *et al.*, 2001; John  
646 *et al.*, 2001; Lim *et al.*, 2007; Miller *et al.*, 1999). The MKK9-MPK6 cascade  
647 has been shown to positively regulate leaf senescence in Arabidopsis (Zhou  
648 *et al.*, 2009). Hyperactivation of MPK6 and other MAPKs, in addition to  
649 autoimmune-like responses, also promotes senescence, which is very evident  
650 in older leaves of *ap2c1 mkp1* plants and correlates with significant  
651 upregulation of the senescence-specific marker gene *SAG12* (Guo and Gan,  
652 2005; Noh and Amasino, 1999). Partial suppression of *SAG12* overexpression  
653 in *ap2c1 mkp1 mpk6* suggests an MPK6-dependent regulation (possibly  
654 involving other MAPKs) in promoting plant senescence.

655 Genome-wide transcriptomics previously identified several senescence-  
656 related TFs from the ANAC family (Breeze *et al.*, 2011). We could highlight  
657 strong MPK6-dependent induction of *ANAC005*, *JUB1/ANAC042* (Saga *et al.*,  
658 2012; Shahnejat-Bushehri *et al.*, 2016; Wu *et al.*, 2012), *ANAC003/XVP*  
659 (Yang *et al.*, 2020), *ANAC047* (Mito *et al.*, 2011), and *ANAC055* (Bu *et al.*,  
660 2008; Hickman *et al.*, 2013; Schweizer *et al.*, 2013; Tran *et al.*, 2004) in *ap2c1*

661 *mkp1* plants. This induction of senescence-related TFs reveals a novel link  
662 between senescence-related processes and MAPK signalling.

663 We conclude that the induction of senescence processes as well as  
664 hypersensitive response-like cell death results in premature death of leaves in  
665 *ap2c1 mkp1* plants. The crosstalk between senescence and abiotic stress or  
666 pathogen responses is accentuated in *ap2c1 mkp1* plants where upregulation  
667 of TFs involved in these processes is happening.

668 Taken together, our results show that two evolutionarily unrelated MAPK  
669 phosphatases, AP2C1 and MKP1, perform both distinct and overlapping  
670 functions in the regulation of stress-induced MPK3, MPK4 and MPK6  
671 activities. Our genetic dissection indicates that the known role of MPK6 in  
672 mediating cell death, ET-, SA- and senescence-related phenotypes is  
673 attenuated by both AP2C1 and MKP1. It also demonstrates that the  
674 expression of specific TF-encoding genes is affected by MAPK(s)  
675 hyperactivation due to the lack of these two MAPK phosphatases *in planta*,  
676 revealing potential new target genes downstream of MPK6 signalling.  
677 Additionally, our data suggest new roles for MPK3 or MPK4 in the regulation  
678 of cell signalling. In the future, the study of individual and combinatorial  
679 mutants will allow us to genetically disentangle the contribution of specific  
680 protein kinases and phosphatases to complex signalling networks and  
681 downstream cell responses.

682

### 683 **Supplementary data**

684 **Supplementary Figure 1:** Phenotypes of Arabidopsis single, double and  
685 triple mutant plants.

686 **Supplementary Figure 2:** Loss of both AP2C1 and MKP1 leads to severe  
687 phenotypes in growth and development, which are mediated by MPK6.

688 **Supplementary Table I.** Expression of TF-encoding genes modulated by the  
689 absence of AP2C1 but not MKP1.

690 **Supplementary Table II.** Expression of TF-encoding genes modulated by the  
691 absence of MKP1 but not of AP2C1.

692 **Supplementary Table III.** Expression of TF-encoding genes modulated by  
693 the absence of both, MKP1 and AP2C1.



694 **Supplementary Table IV.** TF-encoding genes deregulated in *ap2c1 mkp1*  
695 plants.

696

### 697 **Acknowledgements**

698 We thank Verena Ibl (University of Vienna, AT), Mary G. Wallis (University of  
699 Applied Sciences, FH Campus Vienna, AT) and Francesca Cardinale  
700 (University of Turin, IT) for critical reading of the manuscript, and the  
701 Nottingham Arabidopsis Stock Centre for providing SALK mutant lines. This  
702 work was supported by the Austrian Science Fund (FWF) with the grants I-  
703 255, W1220-B09 to IM and P27254 to IM/AS. SeB was supported by the  
704 German Research Foundation (DFG) through the Research Training Group  
705 GRK1305. BMR and SaB thank the MPI of Molecular Plant Physiology  
706 (Potsdam, DE) for financial support.

707

708

709

### 710 **Author contributions**

711 ZA, VK, VS, KK, MaS, WR, MiS, SeB, SaB and AS performed experiments,  
712 ZA, VK, VS, KK, FM, RU, SaB, BMR, IM and AS designed experiments; and  
713 ZA, SaB, BMR, IM and AS wrote the paper.

714

### 715 **Dedication**

716 The authors dedicate this article to the memories of:

717

718 Irute Meskiene (1956-2017)

719 (Paškauskas *et al.*, 2017)

720

721 Manfred Schwanninger (1963-2013)

722 (Meder, 2014)

723

### 724 **Data availability statement**

725 The data supporting the findings of this study are available from the  
726 corresponding author (Alois Schweighofer), upon request.

727



## References

- Anderson JC, Bartels S, Gonzalez Besteiro MA, Shahollari B, Ulm R, Peck SC.** 2011. Arabidopsis MAP Kinase Phosphatase 1 (AtMKP1) negatively regulates MPK6-mediated PAMP responses and resistance against bacteria. *Plant Journal* **67**, 258-268.
- Anderson JC, Wan Y, Kim YM, Pasa-Tolic L, Metz TO, Peck SC.** 2014. Decreased abundance of type III secretion system-inducing signals in Arabidopsis *mkp1* enhances resistance against *Pseudomonas syringae*. *Proceedings of the National Academy of Sciences, USA* **111**, 6846-6851.
- Andreasson E, Ellis B.** 2010. Convergence and specificity in the Arabidopsis MAPK nexus. *Trends in Plant Science* **15**, 106-113.
- Asai T, Tena G, Plotnikova J, Willmann MR, Chiu WL, Gomez-Gomez L, Boller T, Ausubel FM, Sheen J.** 2002. MAP kinase signalling cascade in Arabidopsis innate immunity. *Nature* **415**, 977-983.
- Balazadeh S, Riano-Pachon DM, Mueller-Roeber B.** 2008. Transcription factors regulating leaf senescence in *Arabidopsis thaliana*. *Plant Biology* **10 Suppl 1**, 63-75.
- Bartels S, Anderson JC, Gonzalez Besteiro MA, Carreri A, Hirt H, Buchala A, Metraux JP, Peck SC, Ulm R.** 2009. MAP KINASE PHOSPHATASE 1 and PROTEIN TYROSINE PHOSPHATASE 1 are repressors of salicylic acid synthesis and SNC1-mediated responses in Arabidopsis. *Plant Cell* **21**, 2884-2897.
- Bartels S, Gonzalez Besteiro MA, Lang D, Ulm R.** 2010. Emerging functions for plant MAP kinase phosphatases. *Trends in Plant Science* **15**, 322-329.
- Bethke G, Unthan T, Uhrig JF, Poschl Y, Gust AA, Scheel D, Lee J.** 2009. Flg22 regulates the release of an ethylene response factor substrate from MAP kinase 6 in *Arabidopsis thaliana* via ethylene signaling. *Proceedings of the National Academy of Sciences, USA* **106**, 8067-8072.
- Bigeard J, Hirt H.** 2018. Nuclear signaling of plant MAPKs. *Frontiers in Plant Science* **9**, 469.

- Birkenbihl RP, Kracher B, Roccaro M, Somssich IE.** 2017. Induced genome-wide binding of three arabidopsis WRKY transcription factors during early MAMP-triggered immunity. *Plant Cell* **29**, 20-38.
- Breeze E, Harrison E, McHattie S, Hughes L, Hickman R, Hill C, Kiddle S, Kim YS, Penfold CA, Jenkins D, Zhang C, Morris K, Jenner C, Jackson S, Thomas B, Tabrett A, Legaie R, Moore JD, Wild DL, Ott S, Rand D, Beynon J, Denby K, Mead A, Buchanan-Wollaston V.** 2011. High-resolution temporal profiling of transcripts during Arabidopsis leaf senescence reveals a distinct chronology of processes and regulation. *Plant Cell* **23**, 873-894.
- Bu Q, Jiang H, Li CB, Zhai Q, Zhang J, Wu X, Sun J, Xie Q, Li C.** 2008. Role of the *Arabidopsis thaliana* NAC transcription factors ANAC019 and ANAC055 in regulating jasmonic acid-signaled defense responses. *Cell Research* **18**, 756-767.
- Caunt CJ, Keyse SM.** 2013. Dual-specificity MAP kinase phosphatases (MKPs): shaping the outcome of MAP kinase signalling. *FEBS Journal* **280**, 489-504.
- Czechowski T, Bari RP, Stitt M, Scheible WR, Udvardi MK.** 2004. Real-time RT-PCR profiling of over 1400 Arabidopsis transcription factors: unprecedented sensitivity reveals novel root- and shoot-specific genes. *Plant Journal* **38**, 366-379.
- Fuchs S, Grill E, Meskiene I, Schweighofer A.** 2013. Type 2C protein phosphatases in plants. *FEBS Journal* **280**, 681-693.
- Galletti R, Ferrari S, De Lorenzo G.** 2011. Arabidopsis MPK3 and MPK6 play different roles in basal and oligogalacturonide- or flagellin-induced resistance against *Botrytis cinerea*. *Plant Physiology* **157**, 804-814.
- Genot B, Lang J, Berriri S, Garmier M, Gilard F, Pateyron S, Hastraete K, Van Der Straeten D, Hirt H, Colcombet J.** 2017. Constitutively active Arabidopsis MAP kinase 3 triggers defense responses involving salicylic acid and SUMM2 resistance protein. *Plant Physiology* **174**, 1238-1249.
- Gonzalez Besteiro MA, Bartels S, Albert A, Ulm R.** 2011. Arabidopsis MAP kinase phosphatase 1 and its target MAP kinases 3 and 6 antagonistically determine UV-B stress tolerance, independent of the UVR8 photoreceptor pathway. *Plant Journal* **68**, 727-737.

- Gonzalez Besteiro MA, Ulm R.** 2013. Phosphorylation and stabilization of Arabidopsis MAP kinase phosphatase 1 in response to UV-B stress. *Journal of Biological Chemistry* **288**, 480-486.
- Guan Y, Meng X, Khanna R, LaMontagne E, Liu Y, Zhang S.** 2014. Phosphorylation of a WRKY transcription factor by MAPKs is required for pollen development and function in Arabidopsis. *PLoS Genetics* **10**, e1004384.
- Guo Y, Gan S.** 2005. Leaf senescence: signals, execution, and regulation. *Current Topics in Developmental Biology* **71**, 83-112.
- Hanfrey C, Fife M, Buchanan-Wollaston V.** 1996. Leaf senescence in *Brassica napus*: expression of genes encoding pathogenesis-related proteins. *Plant Molecular Biology* **30**, 597-609.
- He Y, Tang W, Swain JD, Green AL, Jack TP, Gan S.** 2001. Networking senescence-regulating pathways by using Arabidopsis enhancer trap lines. *Plant Physiology* **126**, 707-716.
- Hickman R, Hill C, Penfold CA, Breeze E, Bowden L, Moore JD, Zhang P, Jackson A, Cooke E, Bewicke-Copley F, Mead A, Beynon J, Wild DL, Denby KJ, Ott S, Buchanan-Wollaston V.** 2013. A local regulatory network around three NAC transcription factors in stress responses and senescence in Arabidopsis leaves. *Plant Journal* **75**, 26-39.
- Ichimura K, Casais C, Peck SC, Shinozaki K, Shirasu K.** 2006. MEKK1 is required for MPK4 activation and regulates tissue-specific and temperature-dependent cell death in Arabidopsis. *Journal of Biological Chemistry* **281**, 36969-36976.
- Jensen MK, Kjaersgaard T, Nielsen MM, Galberg P, Petersen K, O'Shea C, Skriver K.** 2010. The *Arabidopsis thaliana* NAC transcription factor family: structure-function relationships and determinants of ANAC019 stress signalling. *Biochemical Journal* **426**, 183-196.
- Jiang L, Chen Y, Luo L, Peck SC.** 2018. Central roles and regulatory mechanisms of dual-specificity MAPK phosphatases in developmental and stress signaling. *Frontiers in Plant Science* **9**, 1697.
- John CF, Morris K, Jordan BR, Thomas B, S AH-M.** 2001. Ultraviolet-B exposure leads to up-regulation of senescence-associated genes in *Arabidopsis thaliana*. *Journal of Experimental Botany* **52**, 1367-1373.

**Ju C, Chang C.** 2012. Advances in ethylene signalling: protein complexes at the endoplasmic reticulum membrane. *AoB Plants* **2012**, pls031.

**Kim CY, Liu Y, Thorne ET, Yang H, Fukushige H, Gassmann W, Hildebrand D, Sharp RE, Zhang S.** 2003. Activation of a stress-responsive mitogen-activated protein kinase cascade induces the biosynthesis of ethylene in plants. *Plant Cell* **15**, 2707-2718.

**Kim CY, Zhang S.** 2004. Activation of a mitogen-activated protein kinase cascade induces WRKY family of transcription factors and defense genes in tobacco. *Plant Journal* **38**, 142-151.

**Krysan PJ, Colcombet J.** 2018. Cellular complexity in MAPK signaling in plants: questions and emerging tools to answer them. *Frontiers in Plant Science* **9**, 1674.

**Lampard GR, Lukowitz W, Ellis BE, Bergmann DC.** 2009. Novel and expanded roles for MAPK signaling in Arabidopsis stomatal cell fate revealed by cell type-specific manipulations. *Plant Cell* **21**, 3506-3517.

**Lassowskat I, Bottcher C, Eschen-Lippold L, Scheel D, Lee J.** 2014. Sustained mitogen-activated protein kinase activation reprograms defense metabolism and phosphoprotein profile in *Arabidopsis thaliana*. *Frontiers in Plant Science* **5**, 554.

**Li G, Meng X, Wang R, Mao G, Han L, Liu Y, Zhang S.** 2012. Dual-level regulation of ACC synthase activity by MPK3/MPK6 cascade and its downstream WRKY transcription factor during ethylene induction in Arabidopsis. *PLoS Genetics* **8**, e1002767.

**Li S, Han X, Yang L, Deng X, Wu H, Zhang M, Liu Y, Zhang S, Xu J.** 2018. Mitogen-activated protein kinases and calcium-dependent protein kinases are involved in wounding-induced ethylene biosynthesis in *Arabidopsis thaliana*. *Plant, Cell & Environment* **41**, 134-147.

**Lim PO, Kim HJ, Nam HG.** 2007. Leaf senescence. *Annual Review of Plant Biology* **58**, 115-136.

**Liu Y, Ren D, Pike S, Pallardy S, Gassmann W, Zhang S.** 2007. Chloroplast-generated reactive oxygen species are involved in hypersensitive response-like cell death mediated by a mitogen-activated protein kinase cascade. *Plant Journal* **51**, 941-954.

**Liu Y, Zhang S.** 2004. Phosphorylation of 1-aminocyclopropane-1-carboxylic acid synthase by MPK6, a stress-responsive mitogen-activated protein kinase, induces ethylene biosynthesis in Arabidopsis. *Plant Cell* **16**, 3386-3399.

**Mao G, Meng X, Liu Y, Zheng Z, Chen Z, Zhang S.** 2011. Phosphorylation of a WRKY transcription factor by two pathogen-responsive MAPKs drives phytoalexin biosynthesis in Arabidopsis. *Plant Cell* **23**, 1639-1653.

**Marshall CJ.** 1995. Specificity of receptor tyrosine kinase signaling: transient versus sustained extracellular signal-regulated kinase activation. *Cell* **80**, 179-185.

**Meder R.** 2014. Manfred Schwanninger 4 September 1963–25 December 2013. *NIR news* **25**, 18-19.

**Meng X, Zhang S.** 2013. MAPK cascades in plant disease resistance signaling. *Annual Review of Phytopathology* **51**, 245-266.

**Menke FL, Kang HG, Chen Z, Park JM, Kumar D, Klessig DF.** 2005. Tobacco transcription factor WRKY1 is phosphorylated by the MAP kinase SIPK and mediates HR-like cell death in tobacco. *Molecular Plant-Microbe Interactions* **18**, 1027-1034.

**Mergner J, Frejno M, List M, Papacek M, Chen X, Chaudhary A, Samaras P, Richter S, Shikata H, Messerer M, Lang D, Altmann S, Cyprys P, Zolg DP, Mathieson T, Bantscheff M, Hazarika RR, Schmidt T, Dawid C, Dunkel A, Hofmann T, Sprunck S, Falter-Braun P, Johannes F, Mayer KFX, Jurgens G, Wilhelm M, Baumbach J, Grill E, Schneitz K, Schwechheimer C, Kuster B.** 2020. Mass-spectrometry-based draft of the Arabidopsis proteome. *Nature* **579**, 409-414.

**Miller JD, Arteca RN, Pell EJ.** 1999. Senescence-associated gene expression during ozone-induced leaf senescence in Arabidopsis. *Plant Physiology* **120**, 1015-1024.

**Mito T, Seki M, Shinozaki K, Ohme-Takagi M, Matsui K.** 2011. Generation of chimeric repressors that confer salt tolerance in Arabidopsis and rice. *Plant Biotechnology Journal* **9**, 736-746.

**Nakano T, Suzuki K, Fujimura T, Shinshi H.** 2006. Genome-wide analysis of the ERF gene family in Arabidopsis and rice. *Plant Physiology* **140**, 411-432.

- Noh YS, Amasino RM.** 1999. Identification of a promoter region responsible for the senescence-specific expression of *SAG12*. *Plant Molecular Biology* **41**, 181-194.
- Overmyer K, Brosche M, Kangasjarvi J.** 2003. Reactive oxygen species and hormonal control of cell death. *Trends in Plant Science* **8**, 335-342.
- Pandey SP, Somssich IE.** 2009. The role of WRKY transcription factors in plant immunity. *Plant Physiology* **150**, 1648-1655.
- Paškauskas R, Schweighofer A, Kvederavičiūtė K.** 2017. In Memoriam Irutė Meškienė (1956–2017). *Botanica* **23**, 178-182.
- Peng Y, van Wersch R, Zhang Y.** 2018. Convergent and divergent signaling in PAMP-triggered immunity and effector-triggered immunity. *Molecular Plant-Microbe Interactions* **31**, 403-409.
- Petersen M, Brodersen P, Naested H, Andreasson E, Lindhart U, Johansen B, Nielsen HB, Lacy M, Austin MJ, Parker JE, Sharma SB, Klessig DF, Martienssen R, Mattsson O, Jensen AB, Mundy J.** 2000. Arabidopsis MAP kinase 4 negatively regulates systemic acquired resistance. *Cell* **103**, 1111-1120.
- Popescu SC, Popescu GV, Bachan S, Zhang Z, Gerstein M, Snyder M, Dinesh-Kumar SP.** 2009. MAPK target networks in *Arabidopsis thaliana* revealed using functional protein microarrays. *Genes & Development* **23**, 80-92.
- Qiu JL, Fiil BK, Petersen K, Nielsen HB, Botanga CJ, Thorgrimsen S, Palma K, Suarez-Rodriguez MC, Sandbech-Clausen S, Lichota J, Brodersen P, Grasser KD, Mattsson O, Glazebrook J, Mundy J, Petersen M.** 2008. Arabidopsis MAP kinase 4 regulates gene expression through transcription factor release in the nucleus. *EMBO Journal* **27**, 2214-2221.
- Rao MV, Lee HI, Davis KR.** 2002. Ozone-induced ethylene production is dependent on salicylic acid, and both salicylic acid and ethylene act in concert to regulate ozone-induced cell death. *Plant Journal* **32**, 447-456.
- Rasmussen MW, Roux M, Petersen M, Mundy J.** 2012. MAP kinase cascades in arabidopsis innate immunity. *Frontiers in Plant Science* **3**, 169.
- Rauf M, Arif M, Fisahn J, Xue GP, Balazadeh S, Mueller-Roeber B.** 2013. NAC transcription factor speedy hyponastic growth regulates flooding-induced leaf movement in Arabidopsis. *Plant Cell* **25**, 4941-4955.

**Ren D, Yang H, Zhang S.** 2002. Cell death mediated by MAPK is associated with hydrogen peroxide production in *Arabidopsis*. *Journal of Biological Chemistry* **277**, 559-565.

**Rodriguez E, El Ghouli H, Mundy J, Petersen M.** 2016. Making sense of plant autoimmunity and 'negative regulators'. *FEBS Journal* **283**, 1385-1391.

**Rodriguez MC, Petersen M, Mundy J.** 2010. Mitogen-activated protein kinase signaling in plants. *Annual Review of Plant Biology* **61**, 621-649.

**Rozhon W, Petutschnig E, Wrzaczek M, Jonak C.** 2005. Quantification of free and total salicylic acid in plants by solid-phase extraction and isocratic high-performance anion-exchange chromatography. *Analytical and Bioanalytical Chemistry* **382**, 1620-1627.

**Rushton PJ, Somssich IE, Ringler P, Shen QJ.** 2010. WRKY transcription factors. *Trends in Plant Science* **15**, 247-258.

**Saga H, Ogawa T, Kai K, Suzuki H, Ogata Y, Sakurai N, Shibata D, Ohta D.** 2012. Identification and characterization of ANAC042, a transcription factor family gene involved in the regulation of camalexin biosynthesis in *Arabidopsis*. *Molecular Plant-Microbe Interactions* **25**, 684-696.

**Schweighofer A, Ayatollahi Z, Meskiene I.** 2009. Phosphatase activities analyzed by *in vivo* expressions. *Methods in Molecular Biology* **479**, 247-260.

**Schweighofer A, Hirt H, Meskiene I.** 2004. Plant PP2C phosphatases: emerging functions in stress signaling. *Trends in Plant Science* **9**, 236-243.

**Schweighofer A, Kazanaviciute V, Scheikl E, Teige M, Doczi R, Hirt H, Schwanninger M, Kant M, Schuurink R, Mauch F, Buchala A, Cardinale F, Meskiene I.** 2007. The PP2C-type phosphatase AP2C1, which negatively regulates MPK4 and MPK6, modulates innate immunity, jasmonic acid, and ethylene levels in *Arabidopsis*. *Plant Cell* **19**, 2213-2224.

**Schweighofer A, Shubchynskyy V, Kazanaviciute V, Djamei A, Meskiene I.** 2014. Bimolecular fluorescent complementation (BiFC) by MAP kinases and MAPK phosphatases. *Methods in Molecular Biology* **1171**, 147-158.

**Schweizer F, Bodenhausen N, Lassueur S, Masclaux FG, Reymond P.** 2013. Differential contribution of transcription factors to *Arabidopsis thaliana* defense against *Spodoptera littoralis*. *Frontiers in Plant Science* **4**, 13.



- Shahnejat-Bushehri S, Tarkowska D, Sakuraba Y, Balazadeh S.** 2016. Arabidopsis NAC transcription factor JUB1 regulates GA/BR metabolism and signalling. *Nature Plants* **2**, 16013.
- Shubchynskyy V, Boniecka J, Schweighofer A, Simulis J, Kvederaviciute K, Stumpe M, Mauch F, Balazadeh S, Mueller-Roeber B, Boutrot F, Zipfel C, Meskiene I.** 2017. Protein phosphatase AP2C1 negatively regulates basal resistance and defense responses to *Pseudomonas syringae*. *Journal of Experimental Botany* **68**, 1169-1183.
- Sidonskaya E, Schweighofer A, Shubchynskyy V, Kammerhofer N, Hofmann J, Wiczorek K, Meskiene I.** 2016. Plant resistance against the parasitic nematode *Heterodera schachtii* is mediated by MPK3 and MPK6 kinases, which are controlled by the MAPK phosphatase AP2C1 in Arabidopsis. *Journal of Experimental Botany* **67**, 107-118.
- Smit ME, McGregor SR, Sun H, Gough C, Bagman AM, Soyars CL, Kroon JT, Gaudinier A, Williams CJ, Yang X, Nimchuk ZL, Weijers D, Turner SR, Brady SM, Etchells JP.** 2020. A PXY-mediated transcriptional network integrates signaling mechanisms to control vascular development in Arabidopsis. *Plant Cell* **32**, 319-335.
- Su SH, Suarez-Rodriguez MC, Krysan P.** 2007. Genetic interaction and phenotypic analysis of the Arabidopsis MAP kinase pathway mutations *mekk1* and *mpk4* suggests signaling pathway complexity. *FEBS Letters* **581**, 3171-3177.
- Suarez-Rodriguez MC, Adams-Phillips L, Liu Y, Wang H, Su SH, Jester PJ, Zhang S, Bent AF, Krysan PJ.** 2007. MEKK1 is required for flg22-induced MPK4 activation in Arabidopsis plants. *Plant Physiology* **143**, 661-669.
- Tran LS, Nakashima K, Sakuma Y, Simpson SD, Fujita Y, Maruyama K, Fujita M, Seki M, Shinozaki K, Yamaguchi-Shinozaki K.** 2004. Isolation and functional analysis of Arabidopsis stress-inducible NAC transcription factors that bind to a drought-responsive *cis*-element in the *early responsive to dehydration stress 1* promoter. *Plant Cell* **16**, 2481-2498.
- Ulm R, Ichimura K, Mizoguchi T, Peck SC, Zhu T, Wang X, Shinozaki K, Paszkowski J.** 2002. Distinct regulation of salinity and genotoxic stress

responses by Arabidopsis MAP kinase phosphatase 1. *EMBO Journal* **21**, 6483-6493.

**Ulm R, Revenkova E, di Sansebastiano GP, Bechtold N, Paszkowski J.** 2001. Mitogen-activated protein kinase phosphatase is required for genotoxic stress relief in Arabidopsis. *Genes & Development* **15**, 699-709.

**Umbrasaite J, Schweighofer A, Kazanaviciute V, Magyar Z, Ayatollahi Z, Unterwurzacher V, Choopayak C, Boniecka J, Murray JA, Bogre L, Meskiene I.** 2010. MAPK phosphatase AP2C3 induces ectopic proliferation of epidermal cells leading to stomata development in Arabidopsis. *PLoS One* **5**, e15357.

**Umbrasaite J, Schweighofer A, Meskiene I.** 2011. Substrate analysis of Arabidopsis PP2C-type protein phosphatases. *Methods in Molecular Biology* **779**, 149-161.

**Wang KL, Li H, Ecker JR.** 2002. Ethylene biosynthesis and signaling networks. *Plant Cell* **14 Suppl**, S131-151.

**Wu A, Allu AD, Garapati P, Siddiqui H, Dortay H, Zanol MI, Asensi-Fabado MA, Munne-Bosch S, Antonio C, Tohge T, Fernie AR, Kaufmann K, Xue GP, Mueller-Roeber B, Balazadeh S.** 2012. JUNGBRUNNEN1, a reactive oxygen species-responsive NAC transcription factor, regulates longevity in Arabidopsis. *Plant Cell* **24**, 482-506.

**Xu J, Li Y, Wang Y, Liu H, Lei L, Yang H, Liu G, Ren D.** 2008. Activation of MAPK kinase 9 induces ethylene and camalexin biosynthesis and enhances sensitivity to salt stress in Arabidopsis. *Journal of Biological Chemistry* **283**, 26996-27006.

**Yang JH, Lee KH, Du Q, Yang S, Yuan B, Qi L, Wang H.** 2020. A membrane-associated NAC domain transcription factor XVP interacts with TDIF co-receptor and regulates vascular meristem activity. *New Phytologist* **226**, 59-74.

**Yang S, Hua J.** 2004. A haplotype-specific *Resistance* gene regulated by *BONZAI1* mediates temperature-dependent growth control in Arabidopsis. *Plant Cell* **16**, 1060-1071.

**Yang S, Poretska O, Sieberer T.** 2018. ALTERED MERISTEM PROGRAM1 restricts shoot meristem proliferation and regeneration by limiting HD-ZIP III-mediated expression of RAP2.6L. *Plant Physiology* **177**, 1580-1594.

**Zhang Z, Wu Y, Gao M, Zhang J, Kong Q, Liu Y, Ba H, Zhou J, Zhang Y.**

2012. Disruption of PAMP-induced MAP kinase cascade by a *Pseudomonas syringae* effector activates plant immunity mediated by the NB-LRR protein SUMM2. *Cell Host Microbe* **11**, 253-263.

**Zhou C, Cai Z, Guo Y, Gan S.** 2009. An Arabidopsis mitogen-activated protein kinase cascade, MKK9-MPK6, plays a role in leaf senescence. *Plant Physiology* **150**, 167-177.

**Zhu Y, Qian W, Hua J.** 2010. Temperature modulates plant defense responses through NB-LRR proteins. *PLoS Pathogens* **6**, e1000844.

## Figure legends

### **Figure 1. Loss of both AP2C1 and MKP1 causes developmental defects and precocious cell death, mediated by MPK6.**

**A.** Phenotypes of WT, *ap2c1*, *mkp1* and *ap2c1 mkp1* plants grown for 8 weeks in short-day conditions. Scale bars = 1 cm. **B.** Formation of macroscopic lesions in leaves of *ap2c1 mkp1* plant shown in Figure 1A. Scale bars = 0.5 cm. **C.** Phenotypes of five-week-old WT, *ap2c1*, *mkp1*, *mpk6*, *ap2c1 mkp1* and *ap2c1 mkp1 mpk6* plants grown in standard short-day conditions. Scale bars = 1 cm. **D.** Phenotypes of five-week-old WT, *ap2c1*, *mkp1*, *mpk6*, *ap2c1 mkp1* and *ap2c1 mkp1 mpk6* plants grown in conditions with increased humidity and elevated temperature. Scale bars = 1 cm. **E.** Phenotypes of WT, *ap2c1*, *ptp1* and *ap2c1 ptp1* plants grown for 6 weeks in short-day conditions. Scale bars = 1 cm.

### **Figure 2. AP2C1 and MKP1 control wound-induced MAPK activities.**

Analysis of wound-induced MPK6, MPK4 and MPK3 kinase activities and protein amounts of leaves from six-week-old WT, *ap2c1*, *mkp1*, and *ap2c1 mkp1* plants grown in short-day conditions. MAPK activities were determined after immunoprecipitation by phosphorylation of myelin basic protein detected by autoradiography. Loading is demonstrated by Coomassie Blue staining (CBS); representative lanes are shown. MAPK protein amounts before and after wounding are demonstrated by immunoblotting of MPK3, MPK4, and MPK6 from total protein extract using specific antibodies. Loading is demonstrated by Ponceau S staining (Rubisco protein). mpw: minutes post wounding.

### **Figure 3. Detection of MKP1 and AP2C1 expression levels in *ap2c1* and *mkp1* mutants.**

Levels of *MKP1* and *AP2C1* transcripts were quantified by RT-qPCR in 14-day-old seedlings grown in long-day conditions, and compared with levels in WT plants. Transcript amounts of *MKP1* and *AP2C1* in WT were taken as 100%. The relative transcript amounts were normalized to the reference gene,

*ACTIN2*. Results are the mean of two biological and two technical replicates for each experiment, \* $p < 0.05$ , Student's *t*-test.

**Figure 4. *ap2c1 mkp1* plants have elevated *ASC6* expression and produce more ET upon wounding than WT, mainly mediated by MPK6.**

**A.** ET levels produced by four-week-old WT, *ap2c1*, *mkp1*, *ap2c1 mkp1*, and *ap2c1 mkp1 mpk6* plants grown in standard long-day conditions. Values are expressed as ET amounts produced per mg plant fresh weight (FW) per hour. Bars represent mean values of three biological replicates  $\pm$  SD, \* $p < 0.05$  Student's *t*-test. **B.** RT-qPCR analysis of *ASC6* expression in leaves of six-week-old WT, *ap2c1*, *mkp1*, *ap2c1 mkp1*, and *ap2c1 mkp1 mpk6* plants grown in short-day conditions, where expression levels in WT are set to 1. Bars represent mean values of three biological replicates  $\pm$  SD, \* $p < 0.05$  Student's *t*-test.

**Figure 5. Venn diagram of TFs differentially expressed in MAPK phosphatase mutant plants.** The number of genes at least three-fold up- or downregulated in *ap2c1*, in *mkp1* and in *ap2c1 mkp1* plants compared to WT in three biological replicates is indicated. The expression of 1,880 TF-encoding genes was analysed.

**Figure 6. Expression of WRKY-encoding (W) genes.**

The transcript levels of WRKY-encoding (W) genes were quantified by RT-qPCR in *ap2c1*, *mkp1*, *ap2c1 mkp1*, *ap2c1 mkp1 mpk6*, and *mpk6* plants, and compared to WT (values set to 1). Bars represent mean values of three replicates  $\pm$  SD. **A.** Upregulation of *WRKY75*, *WRKY30*, *WRKY71*, and *WRKY38* transcript levels in *ap2c1 mkp1* is not solely dependent on MPK6. Data are expressed on a  $\log_{10}$  scale after normalisation over WT values. **B.** Upregulation of *WRKY61*, *WRKY64*, *WRKY62*, *WRKY51*, *WRKY45*, *WRKY55*, *WRKY40*, *WRKY6*, *WRKY47*, *WRKY28* and *WRKY33* transcript levels depends on MPK6, \* $p < 0.05$ , \*\* $p < 0.01$  Mann-Whitney *U* test.

**Figure 7. Genes encoding members of the AP2/ERF TF family are highly upregulated in *ap2c1 mkp1* plants.**

Transcript levels of AP2/ERF-encoding genes were quantified by RT-qPCR in *ap2c1*, *mkp1*, *ap2c1 mkp1*, *ap2c1 mkp1 mpk6*, and *mpk6* plants and compared to WT, where expression levels were set to 1. Bars represent mean values of at least three replicates  $\pm$  SD. Strong upregulation of *At2g33710*, *At1g71520* and *At3g23230* (*ERF98/TDR1*) in *ap2c1 mkp1* is not solely dependent on MPK6, while upregulation of *RAP2.6L*, *WIND3*, *ERF1*, *DREB19*, *ERF14*, and *ERF17* in *ap2c1 mkp1* is almost completely dependent on MPK6, \* $p < 0.05$ , \*\* $p < 0.01$  Mann-Whitney *U* test.

**Figure 8. Genes encoding members of the ANAC TF family are highly upregulated in *ap2c1 mkp1* plants.**

Transcript levels were quantified by RT-qPCR in *ap2c1*, *mkp1*, *ap2c1 mkp1*, *ap2c1 mkp1 mpk6*, and *mpk6* plants and compared to WT, where expression levels were set to 1. Bars represent mean values of at least three replicates  $\pm$  SD. *ANAC005*, *ANAC042*, *ANAC003*, *ANAC047*, and *ANAC055* are upregulated in *ap2c1 mkp1* in a MPK6-dependent manner, while in *ap2c1 mkp1 mpk6* plants their levels are similar to WT, \* $p < 0.05$ , Mann-Whitney *U* test.

**Figure 9. Upregulation of camalexin biosynthetic gene *CYP71B15/PAD3* and camalexin accumulation in *ap2c1 mkp1* plants are mostly mediated by MPK6.**

**A.** Transcript level of *CYP71B15/PAD3*, an enzyme required for camalexin biosynthesis, was quantified by RT-qPCR in *ap2c1*, *mkp1*, *ap2c1 mkp1*, *ap2c1 mkp1 mpk6*, and *mpk6* plants and compared to WT, where expression levels were set to 1. Bars represent mean values of at least three replicates  $\pm$  SD, expressed on a  $\log_{10}$  scale. **B.** Levels of total camalexin determined by HPLC in leaves of 4-week-old WT, *ap2c1*, *mkp1*, *ap2c1 mkp1*, *ap2c1 mkp1 mpk6* and *mpk6* plants. Results shown are mean with SE (n=4), n.d. = not detected, \* $p < 0.05$ , \*\* $p < 0.01$ , Student's *t*-test.



**Figure 10. *ap2c1 mkp1* plants accumulate high levels of SA in a MPK6-dependent manner.**

Total SA levels of five-week-old WT, *ap2c1*, *mkp1*, *ap2c1 mkp1*, *ap2c1 mkp1 mpk6*, and *mpk6* plants grown in standard short-day conditions, determined by HPLC and expressed as ng per g FW. Error bars represent SD of four biological replicates, \*\*\* $p < 0.001$ , Student's *t*-test.

**Figure 11. Upregulation of the senescence-marker gene *SAG12* in *ap2c1 mkp1* plants is mainly mediated by MPK6.**

RT-qPCR quantification of *SAG12* transcript level in leaves of six-week-old *ap2c1*, *mkp1*, *ap2c1 mkp1*, and *ap2c1 mkp1 mpk6* mutant plants compared to WT plants grown in standard short-day conditions. The *ap2c1 mkp1* mutant displays more than 160-times higher *SAG12* transcript level than WT. Of note, *SAG12* upregulation was attenuated in the *ap2c1 mkp1 mpk6* triple mutant (14-times upregulation compared to WT). Error bars represent SD of three biological replicates, \* $p < 0.05$ , Student's *t*-test.

**Supplementary information**

**Supplementary Table I. Expression of TF-encoding genes modulated by the absence of AP2C1 but not MKP1.** Transcript levels were quantified by RT-qPCR and expressed as  $\log_2$  of fold change (FC) for each mutant compared to WT. Genes affected by at least 1.56-fold only in *ap2c1* while not more than 0.9-fold in *mkp1* are listed. Data are from two independent biological replicates and are reported with SE.

**Supplementary Table II. Expression of TF-encoding genes modulated by the absence of MKP1 but not of AP2C1.** Transcript levels were quantified by RT-qPCR and are expressed  $\log_2$  of fold change (FC) for each mutant compared to WT. Genes affected by at least 1.56-fold only in *mkp1* while not more than 0.9-fold in *ap2c1* are listed. Data are from two independent biological replicates and are reported with SE.

**Supplementary Table III. Expression of TF-encoding genes modulated by the absence of both MKP1 and AP2C1.** Transcript levels were quantified by RT-qPCR and are expressed as fold change (FC) in log<sub>2</sub> scale for each of the mutants compared to WT. Genes affected by at least 1.56-fold both in *ap2c1* and *mkp1* are listed. Data are from two independent biological replicates and are reported with SE.

**Supplementary Table IV. TF-encoding genes deregulated in *ap2c1 mkp1* plants.** Gene transcript levels were quantified by RT-qPCR and expressed as fold change in log<sub>2</sub> scale for each of the mutants compared to WT. Genes affected in *ap2c1 mkp1* compared to WT by at least 1.56-fold in log<sub>2</sub> scale are listed. Data are from three independent biological replicates and are reported with SD.

**Supplementary Figure 1. Phenotypes of Arabidopsis single, double and triple mutant plants.**

**A.** Phenotypes of WT, *ap2c1*, and *mkp1* plants grown for three weeks in long-day conditions. **B.** Phenotypes of WT, *ap2c1 mkp1*, *ap2c2 mkp1*, and *ap2c3 mkp1* plants grown for four weeks in short-day conditions. **C.** Phenotypes of WT, *ap2c1*, *ap2c2*, *ap2c3*, *mkp1*, *ap2c1 mkp1*, *ap2c2 mkp1*, *ap2c3 mkp1*, *mpk6*, and *ap2c1 mkp1 mpk6* plants grown for four weeks in short-day condition, followed by three weeks in long-day condition.

**Supplementary Figure 2. Loss of both AP2C1 and MKP1 leads to severe phenotypes in growth and development, which are mediated by MPK6.**

**A.** Phenotypes of WT (left) and *ap2c1 mkp1* (right, indicated by arrow) grown for 2.5 weeks in standard long-day conditions. During the first 18 days of growth, the phenotypic differences of *ap2c1 mkp1* compared to WT plants are visibly manifested as a difference in plant size. **B.** After approximately 3.5 weeks (26 days), premature death of leaf tissue as well as abnormal leaf growth and morphology in *ap2c1 mkp1* plants (right, indicated by arrow) became apparent. Scale bars in **A** and **B** = 1 cm. **C.** Close-up of *ap2c1 mkp1* plant grown for 3.5 weeks in standard long-day condition. **D.** Phenotype of seven-week-old *ap2c1 mkp1* plant grown in standard long-day condition. **E.**

Close-up of seven-week-old *ap2c1 mkp1* plant showing misshaped inflorescence. **F, G.** Phenotypes of eight-week-old WT, *ap2c1*, *mkp1*, *ap2c1 mkp1*, and *ap2c1 mkp1 mpk6* plants grown for the first six weeks in short-day and for a further two weeks in long-day conditions. The *ap2c1 mkp1* double mutant displays a severe dwarf phenotype, premature leaf decay, lack of normal shoot development, and strongly impaired inflorescence growth. The inset picture above shows a close-up of the *ap2c1 mkp1* plant shown. In *ap2c1 mkp1 mpk6* triple mutant plants these phenotypes were rescued.

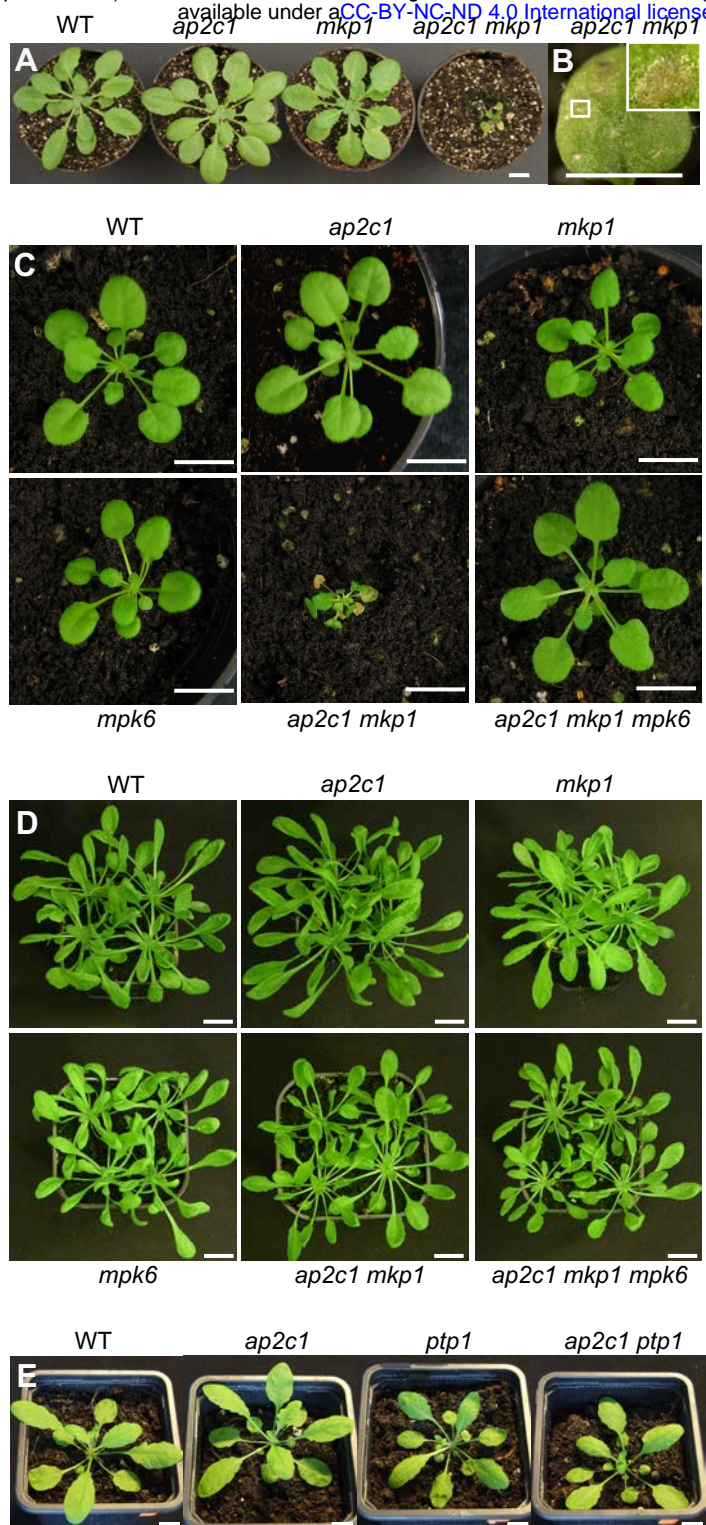

**Figure 1. Loss of both AP2C1 and MKP1 causes developmental defects and precocious cell death, mediated by MPK6.**

**A.** Phenotypes of WT, *ap2c1*, *mkp1* and *ap2c1 mkp1* plants grown for 8 weeks in short-day conditions. Scale bars = 1 cm.

**B.** Formation of macroscopic lesions in leaves of *ap2c1 mkp1* plant shown in Figure 1A. Scale bars = 0.5 cm.

**C.** Phenotypes of five weeks old WT, *ap2c1*, *mkp1*, *mpk6*, *ap2c1 mkp1* and *ap2c1 mkp1 mpk6* plants grown in standard short-day conditions. Scale bars = 1 cm.

**D.** Phenotypes of five-week-old WT, *ap2c1*, *mkp1*, *mpk6*, *ap2c1 mkp1* and *ap2c1 mkp1 mpk6* plants grown in conditions with increased humidity and elevated temperature. Scale bars = 1 cm.

**E.** Phenotypes of WT, *ap2c1*, *ptp1* and *ap2c1 ptp1* plants grown for 6 weeks in short-day conditions. Scale bars = 1 cm.

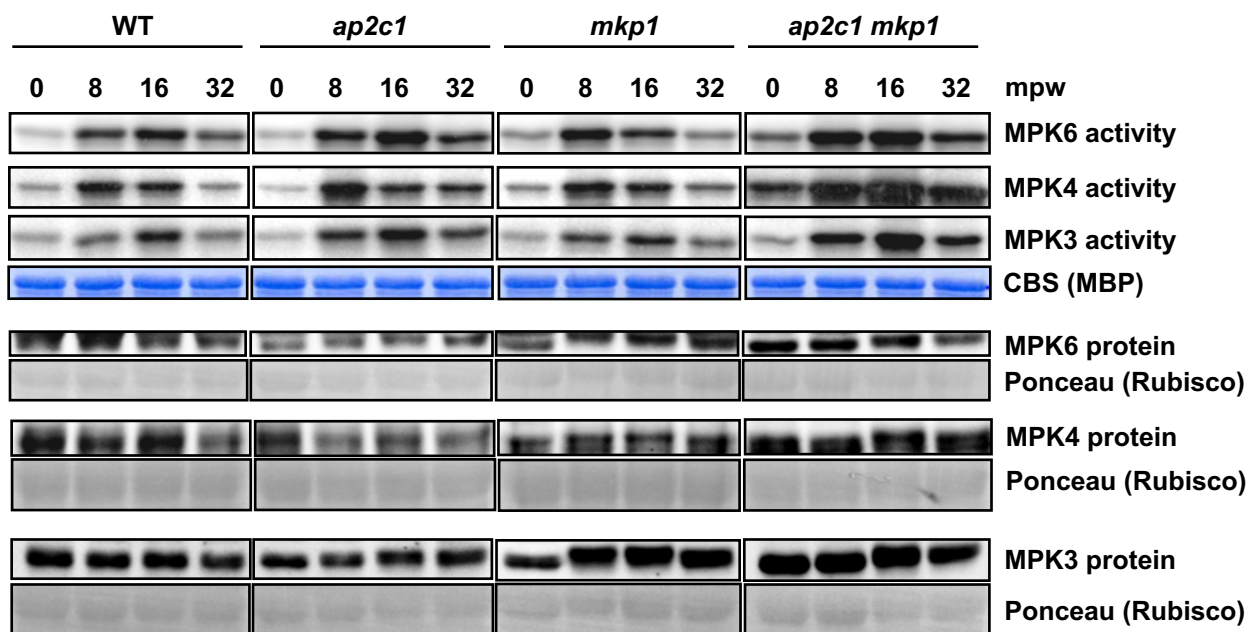

**Figure 2. AP2C1 and MKP1 control wound-induced MAPK activities.**

Analysis of wound-induced MPK6, MPK4 and MPK3 kinase activities and protein amounts of leaves from six-week-old WT, *ap2c1*, *mkp1*, and *ap2c1 mkp1* plants grown in short day conditions. MAPK activities were determined after immunoprecipitation by phosphorylation of myelin basic protein detected by autoradiography. Loading is demonstrated by Coomassie blue staining (CBS); representative lanes are shown. MAPK protein amounts before and after wounding are demonstrated by immunoblotting of MPK3, MPK4 and MPK6 from total protein extract using specific antibodies. Loading is demonstrated by Ponceau S staining (Rubisco protein). mpw: minutes post wounding

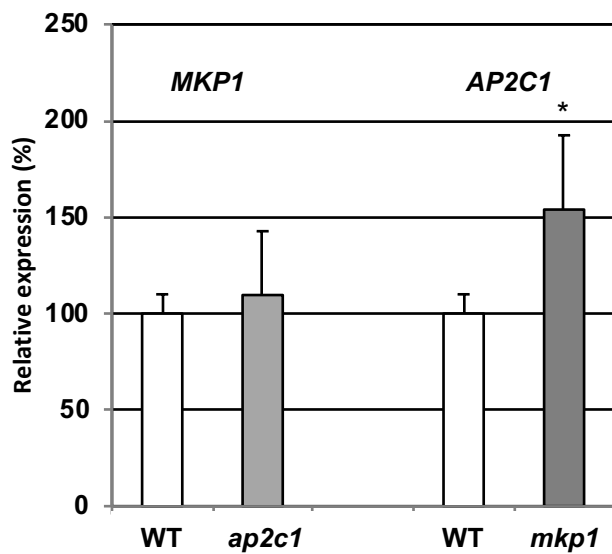

**Figure 3. Detection of *MKP1* and *AP2C1* expression levels in *ap2c1* and *mkp1* mutants.**

Levels of *MKP1* and *AP2C1* transcripts were quantified by RT-qPCR in 14-day-old seedlings grown in long-day conditions and compared with levels in WT plants. Transcript amounts of *MKP1* and *AP2C1* in WT were taken as 100%. The relative transcript amounts were normalized to the reference gene, *ACTIN2*. Error bars indicate SD. Results are the mean of two biological and two technical replicates for each experiment, \* $p < 0.05$  Student's *t*-test.

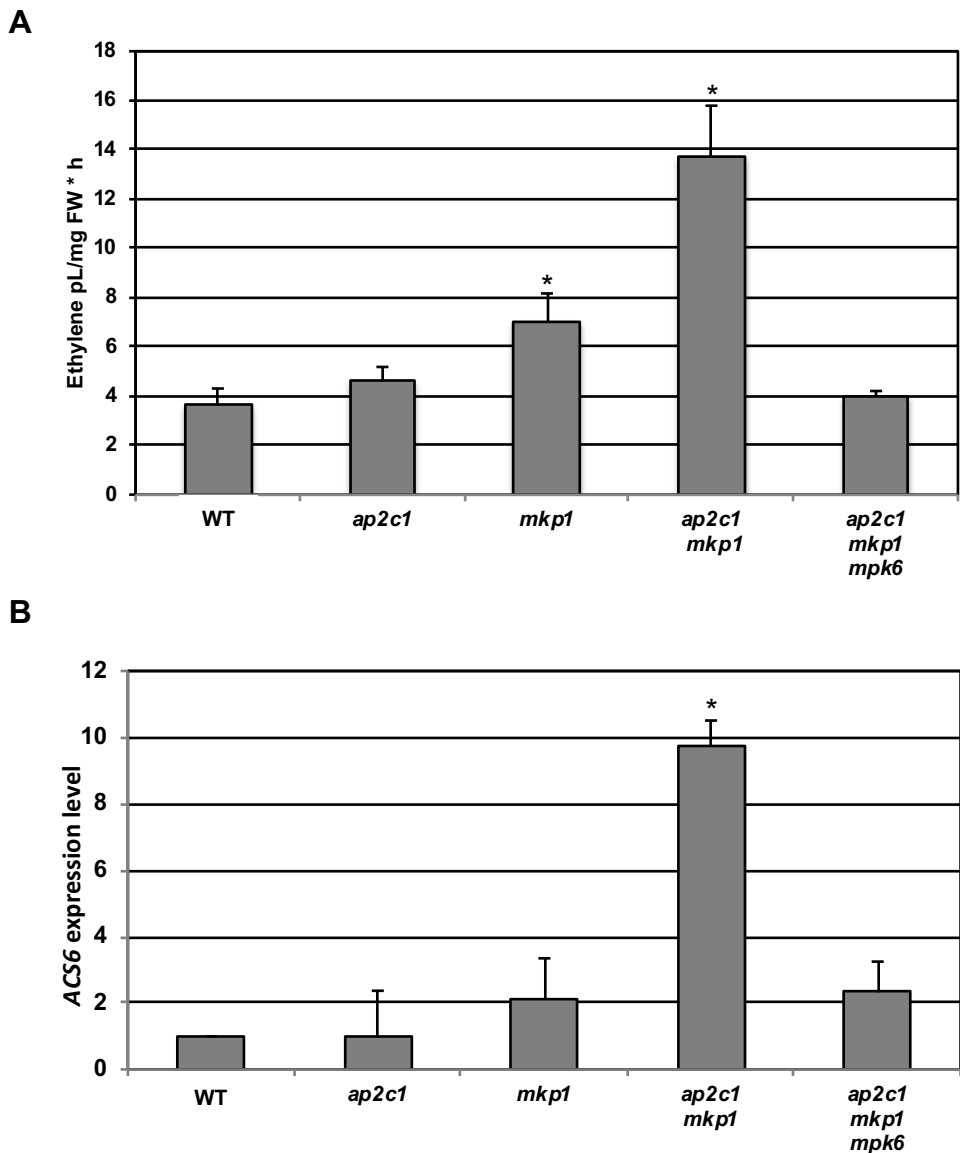

**Figure 4. *ap2c1 mkp1* plants have elevated *ASC6* expression and produce more ET upon wounding than WT, mainly mediated by *MPK6*.**

**A.** ET levels produced by four-week-old WT, *ap2c1*, *mkp1*, *ap2c1 mkp1*, and *ap2c1 mkp1 mpk6* plants grown in standard long-day conditions. Values are expressed as ET amounts produced per mg plant fresh weight (FW) per hour. Bars represent mean values of three biological replicates  $\pm$  SD, \* $p < 0.05$  Student's *t*-test.

**B.** RT-qPCR analysis of *ASC6* expression in leaves of six-week-old WT, *ap2c1*, *mkp1*, *ap2c1 mkp1* and *ap2c1 mkp1 mpk6* plants grown in short-day conditions, where expression levels in WT are set to 1. Bars represent mean values of three biological replicates with SD, \* $p < 0.05$ , Student's *t*-test.



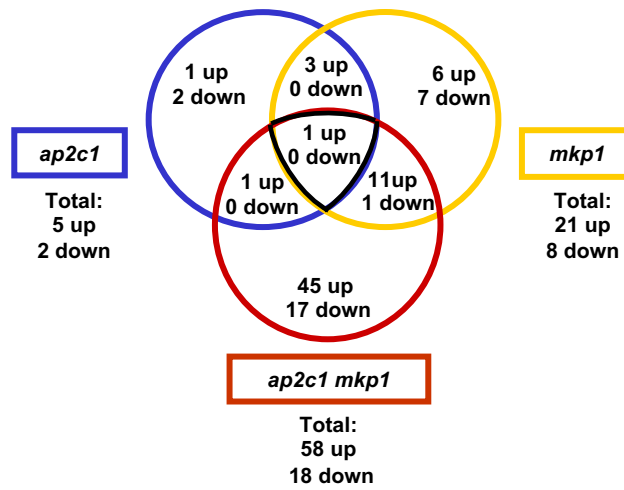

**Figure 5. Venn diagram of TFs differentially expressed in the MAPK phosphatase mutant plants.** The number of genes at least three-fold up- or downregulated in *ap2c1*, in *mkp1* and in *ap2c1 mkp1* plants compared to WT in three biological replicates is indicated. The expression of 1,880 TF-encoding genes was analysed.

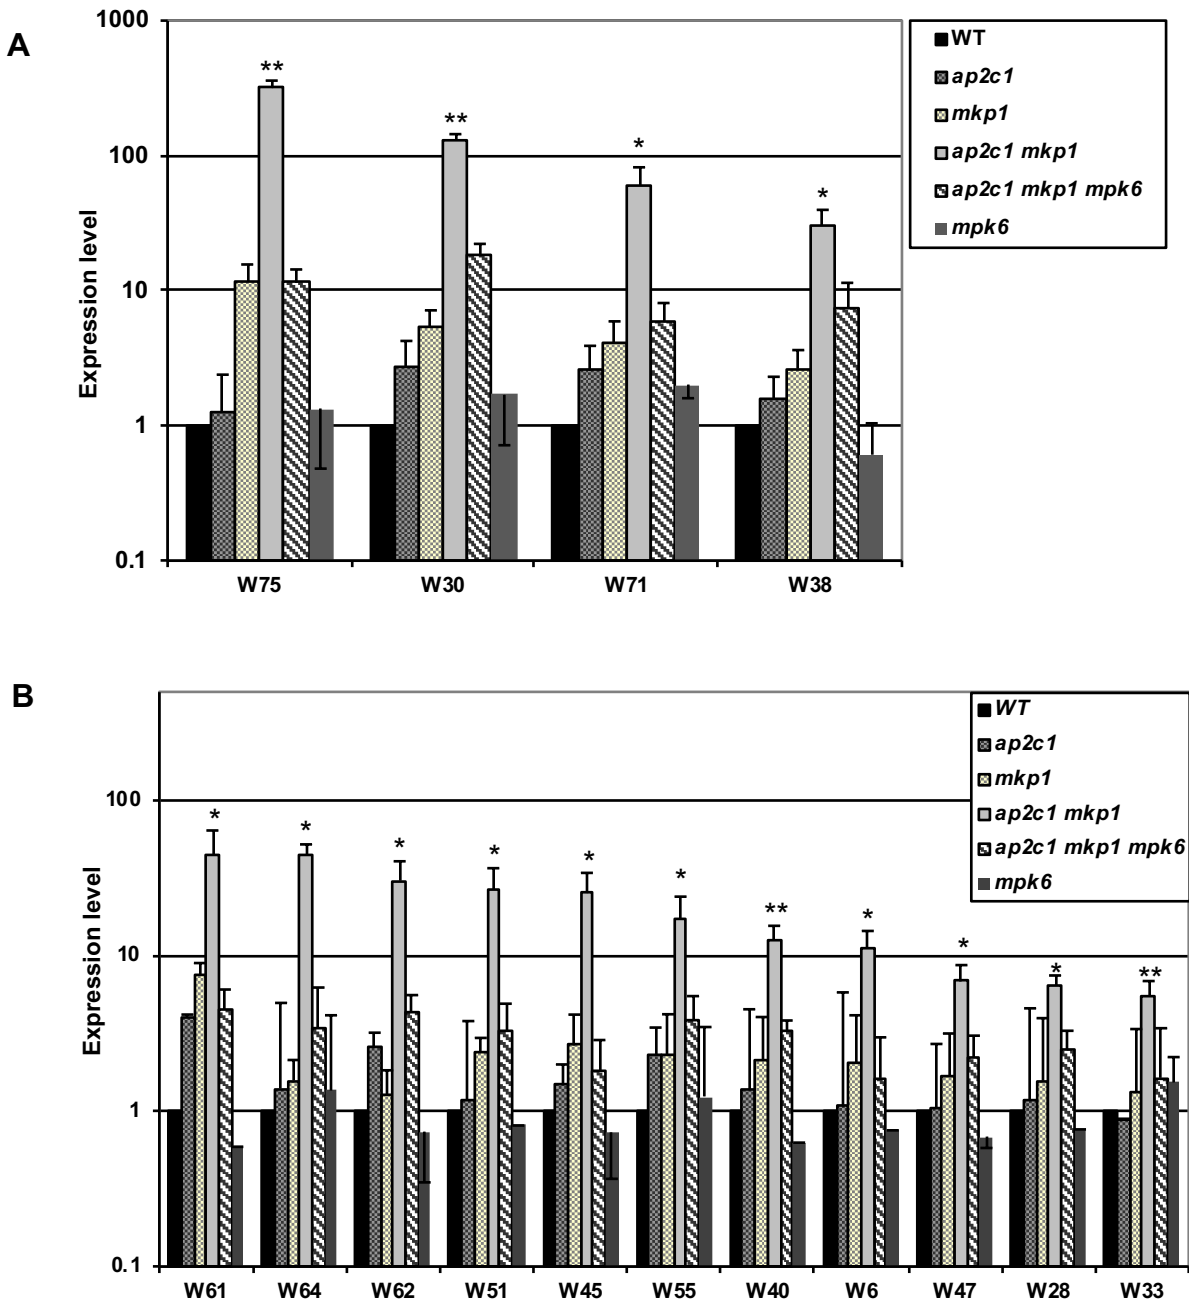

**Figure 6. Expression of WRKY-encoding (W) genes.** The transcript levels of WRKY-encoding (W) genes were quantified by RT-qPCR in *ap2c1*, *mkp1*, *ap2c1 mkp1*, *ap2c1 mkp1 mpk6* and *mpk6* plants, and compared to WT (values set to 1). Bars represent mean values of three replicates with  $\pm$  SD. **A.** Upregulation of *WRKY75*, *WRKY30*, *WRKY71*, and *WRKY38* transcript levels in *ap2c1 mkp1* is not solely dependent on MPK6. Data are expressed on a log<sub>10</sub> scale after normalisation over WT values. **B.** Upregulation of *WRKY61*, *WRKY64*, *WRKY62*, *WRKY51*, *WRKY45*, *WRKY55*, *WRKY40*, *WRKY6*, *WRKY47*, *WRKY28* and *WRKY33* transcript levels depends on MPK6, \* $p < 0.05$ , \*\* $p < 0.01$  Mann-Whitney *U* test.

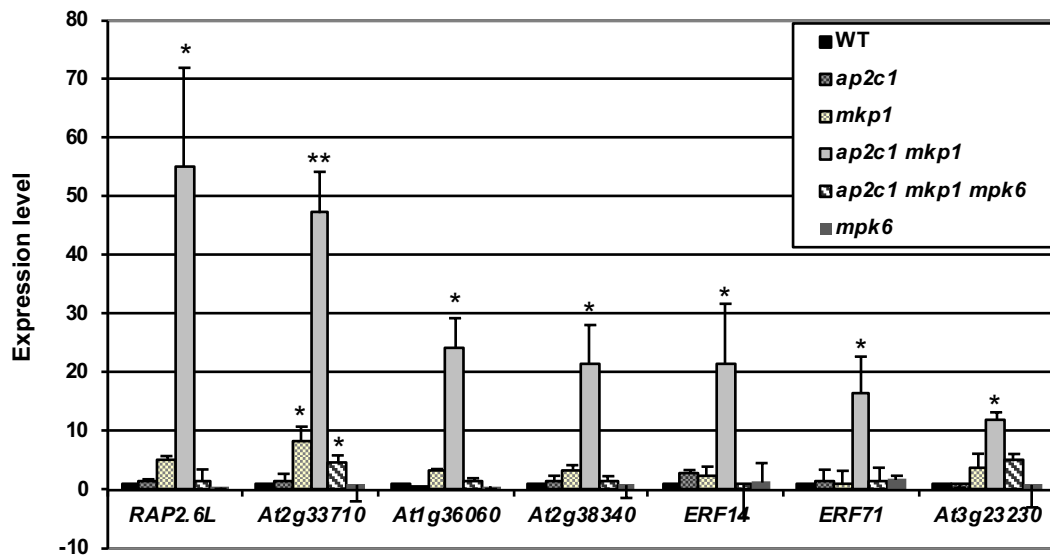

**Figure 7. Genes encoding members of the AP2/ERF TF family are highly upregulated in *ap2c1 mkp1* plants.** Transcript levels of AP2/ERF-encoding genes were quantified by RT-qPCR in *ap2c1*, *mkp1*, *ap2c1 mkp1*, *ap2c1 mkp1 mpk6*, and *mpk6* plants and compared to WT, where expression levels in WT were set to 1. Bars represent mean values of at least three replicates with SD indicated. Strong upregulation of *At2g33710*, *At1g71520* and *At3g23230* (*ERF98/TDR1*) in *ap2c1 mkp1* is not solely dependent on MPK6, while upregulation of *RAP2.6L*, *WIND3*, *ERF1*, *DREB19*, *ERF14*, and *ERF17* in *ap2c1 mkp1* is almost completely dependent on MPK6, \*p < 0.05, \*\*p < 0.01 Mann-Whitney U test.

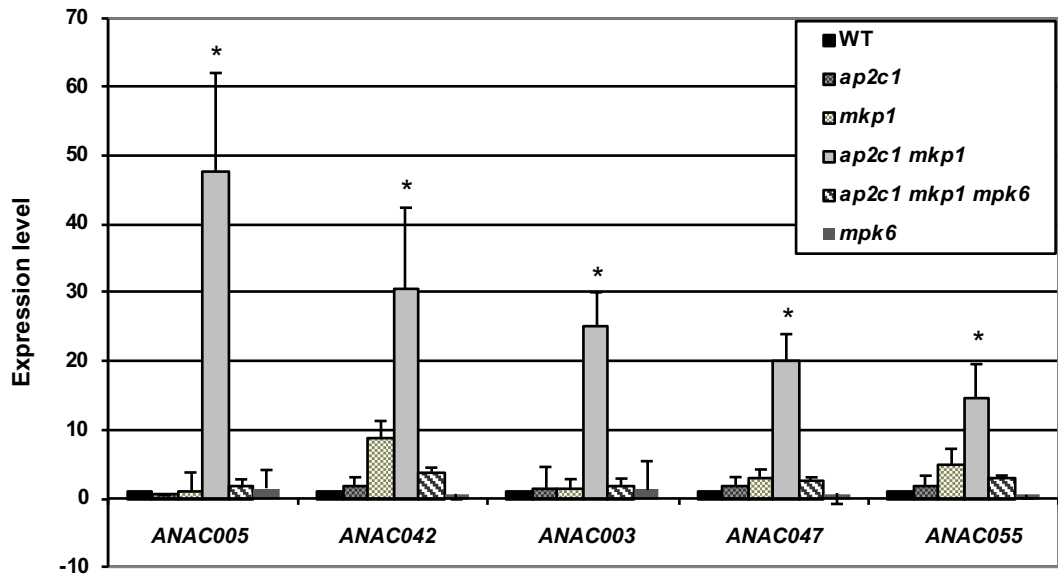

**Figure 8. Genes encoding members of the ANAC TF family are highly upregulated in *ap2c1 mkp1* plants.** Transcript levels were quantified by RT-qPCR in *ap2c1*, *mkp1*, *ap2c1 mkp1*, *ap2c1 mkp1 mpk6* and *mpk6* plants and compared to WT, where expression levels in were set to 1. Bars represent mean values of at least three replicates  $\pm$  SD. *ANAC005*, *ANAC042*, *ANAC003*, *ANAC047*, and *ANAC055* are upregulated in *ap2c1 mkp1* in a MPK6-dependent manner, while in *ap2c1 mkp1 mpk6* plants their levels are similar to WT, \* $p < 0.05$ , Mann-Whitney *U* test.

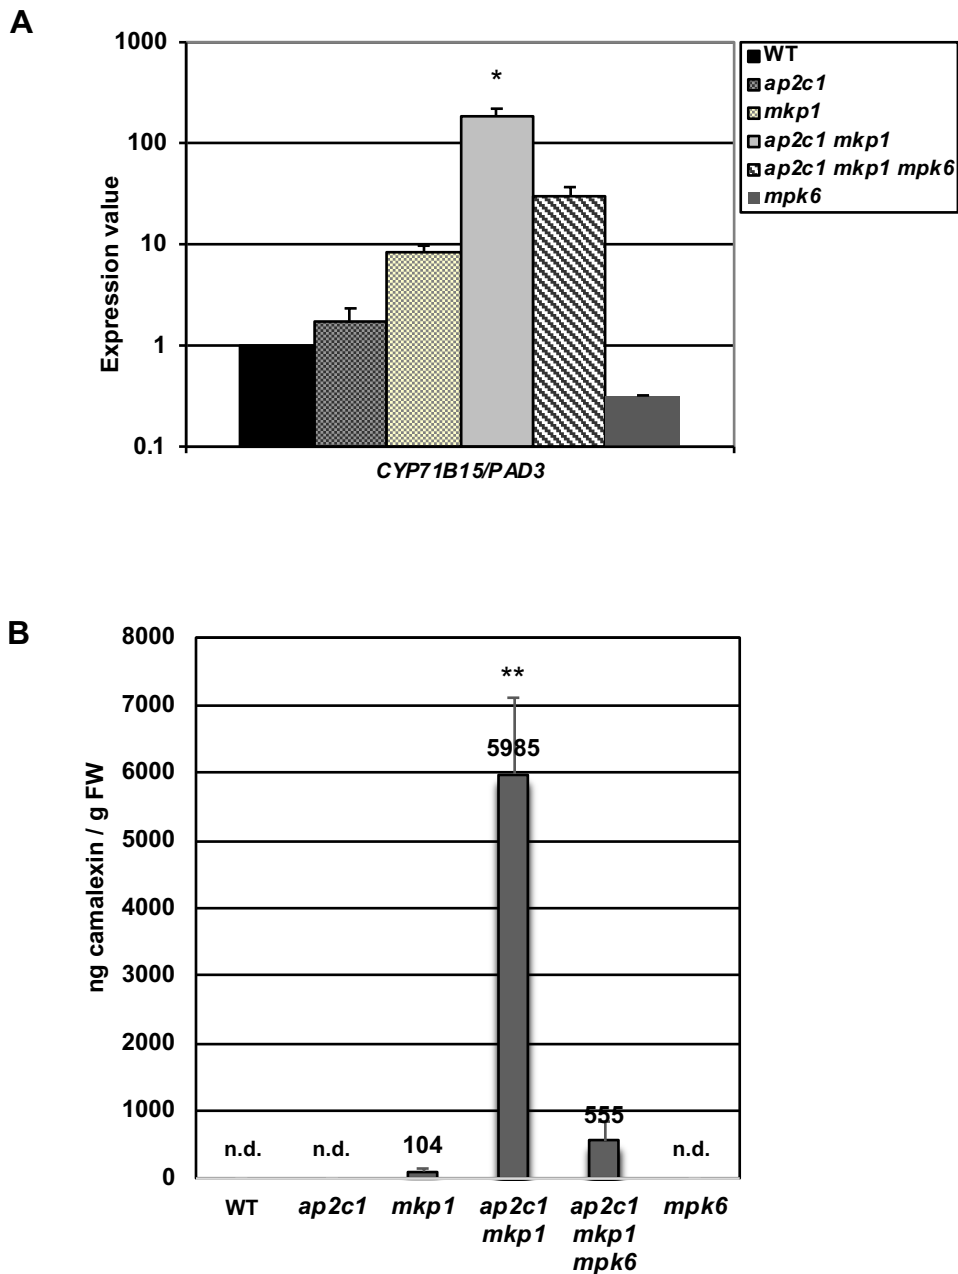

**Figure 9. Upregulation of camalexin biosynthetic gene *CYP71B15/PAD3* and camalexin accumulation in *ap2c1 mkp1* plants are mostly mediated by MPK6.**

**A.** Transcript level of *CYP71B15/PAD3*, an enzyme required for camalexin biosynthesis, was quantified by RT-qPCR in *ap2c1*, *mkp1*, *ap2c1 mkp1*, *ap2c1 mkp1 mpk6* and *mpk6* plants and compared to WT, where expression levels of were set to 1. Bars represent mean values of at least three replicates  $\pm$  SD, expressed on a log<sub>10</sub> scale. **B.** Levels of total camalexin determined by HPLC in leaves of 4-week-old WT, *ap2c1*, *mkp1*, *ap2c1 mkp1*, *ap2c1 mkp1 mpk6* and *mpk6* plants. Results shown are mean with SE (n=4), n.d. = not detected, \*p < 0.05, \*\*p < 0.01, Student's *t*-test.

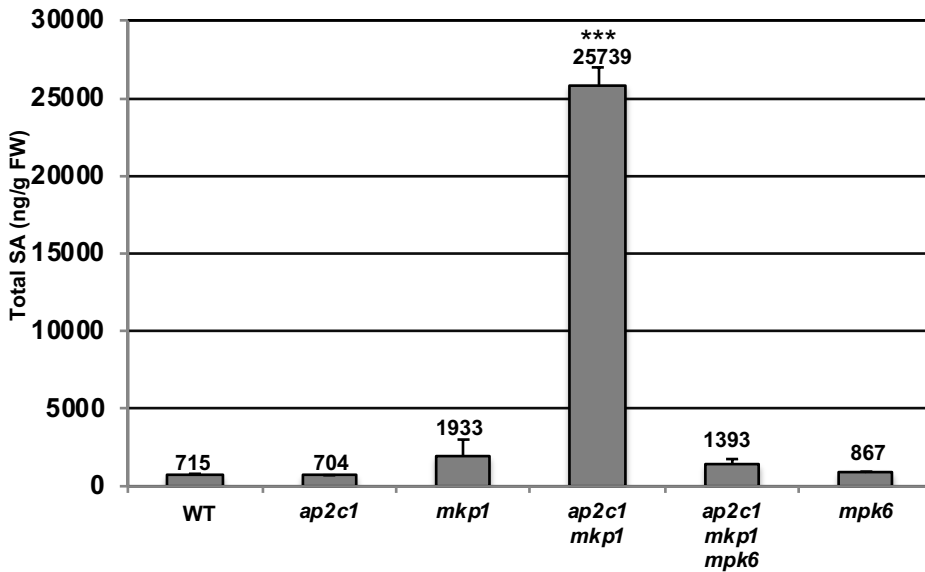

**Figure 10. *ap2c1 mkp1* accumulate prominently higher levels of SA in a MPK6-dependent manner.**

Total SA levels of five-week-old *wt*, *ap2c1*, *mkp1*, *ap2c1 mkp1*, *ap2c1 mkp1 mpk6* and *mpk6* and plants grown in standard short-day conditions were determined by HPLC and expressed as ng per g FW. Error bars represent SD of four biological replicates, \*\*\* $p < 0.001$ , Student's *t*-test.

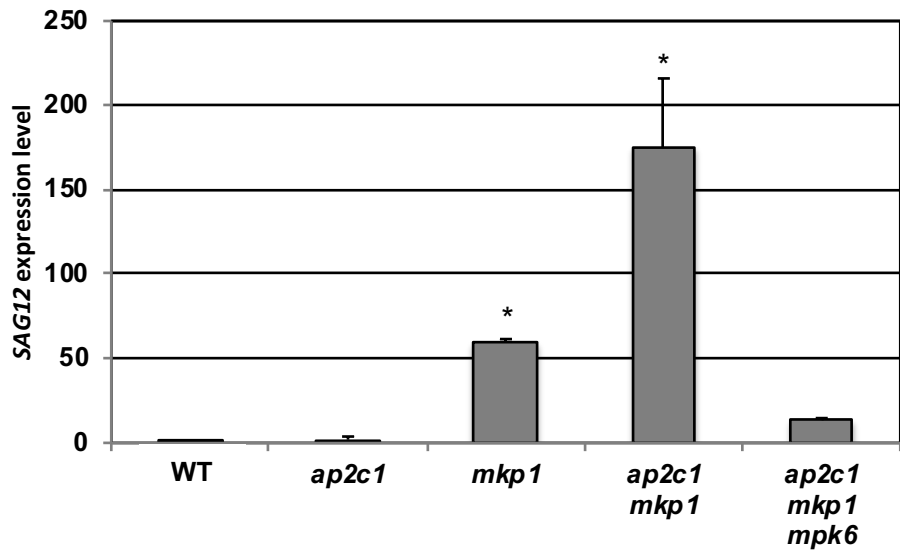

**Figure 11. Upregulation of senescence marker gene *SAG12* in *ap2c1 mkp1* plants is mainly mediated by MPK6.**

RT-qPCR quantification of *SAG12* transcript level in leaves of six-week-old *ap2c1*, *mkp1*, *ap2c1 mkp1* and *ap2c1 mkp1 mpk6* mutant plants compared to WT plants grown in standard short-day conditions. *ap2c1 mkp1* mutants display more than 160-times higher *SAG12* transcript level than WT. Of note, *SAG12* upregulation was attenuated in the *ap2c1 mkp1 mpk6* triple mutant (14-times upregulation compared to WT). Error bars represent SD of three biological replicates, \* $p < 0.05$ , Student's *t*-test.
